# Supplementary material
Source: HighWire-hosted journal article supplement (doi:10.1101/rna.080600.125)
Supplement: Supplemental_Table_S2.xlsx [file Supplemental_Table_S2.xlsx]

## Sheet: Description
	Sheet name	Details	Reference
Sheet 1	1. List form ClinVar	Unmodified dataset downloaded from ClinVar for ADARB1 missense mutations	https://www.ncbi.nlm.nih.gov/clinvar
Sheet 2	2. Reduced list	Residues that could have contacts with dsRNA, other monomer in a dimer, or within the monomer based on cryoEM structure from PDB: 6VFF	Thuy-Boun AS, Thomas JM, Grajo HL, Palumbo CM, Park S, Nguyen LT, Fisher AJ, Beal PA. Asymmetric dimerization of adenosine deaminase acting on RNA facilitates substrate recognition. Nucleic Acids Res. 2020 Jul 29;48(14):7958-7972. doi:10.1093/nar/gkaa532.
Sheet 3	3. Selected list	Missense mutations that we could get extra information about directly from the companies which could potentially affect the structure, stability, dimerization or RNA binding ability of the monomer
Sheet 4	4. PolyPhen-2 scores	Of the selected variants	http://genetics.bwh.harvard.edu/pph2/
Sheet 5	5. SIFT scores	Of the selected variants	https://sift.bii.a-star.edu.sg/
Sheet 6	6. FATHMM scores	Of the selected variants	http://fathmm.biocompute.org.uk/index.html
Sheet 7	7. MutPred2 scores	Of the selected variants	http://mutpred.mutdb.org/#qform
Sheet 8	8. Chimera modelling	Arg244Gly, Thr375Arg substitutions
Sheet 9	9. Sanger sequencing raw data	editing efficiency

## Sheet: 1. List from ClinVar
Name	Gene(s)	Protein change	Condition(s)	Accession	GRCh37Chromosome	GRCh37Location	GRCh38Chromosome	GRCh38Location	VariationID	AlleleID(s)	dbSNP ID	Canonical SPDI	Variant type	Molecular consequence	Germline classification	Germline date last evaluated	Germline review status	Somatic clinical impact	Somatic clinical impact date last evaluated	Somatic clinical impact review status	Oncogenicity classification	Oncogenicity date last evaluated	Oncogenicity review status	Column1
GRCh38/hg38 21q22.3(chr21:42913213-46670405)x1	AATBC|ADARB1|AGPAT3|AIRE|BNAT1|C21orf58|CBS|CFAP410|COL18A1|COL18A1-AS1|COL18A1-AS2|COL6A1|COL6A2|COL6A2-DT|CRYAA|CSTB|DIP2A|DIP2A-IT1|DNMT3L|DNMT3L-AS1|ERVH48-1|FRGCA|FTCD|FTCD-AS1|GATD3|H2BC12L|HSF2BP|ICOSLG|ITGB2|ITGB2-AS1|KRTAP10-1|KRTAP10-10|KRTAP10-11|KRTAP10-12|KRTAP10-2|KRTAP10-3|KRTAP10-4|KRTAP10-5|KRTAP10-6|KRTAP10-7|KRTAP10-8|KRTAP10-9|KRTAP12-1|KRTAP12-2|KRTAP12-3|KRTAP12-4|LINC00163|…		See cases	VCV000154533	21	44333323 - 48090317	21	42913213 - 46670405	154533	164287			copy number loss		Pathogenic	2010-10-20	no assertion criteria provided
GRCh38/hg38 21q22.2-22.3(chr21:38816399-46677460)x1	AATBC|ABCG1|ADARB1|AGPAT3|AIRE|B3GALT5|B3GALT5-AS1|BACE2|BNAT1|BRWD1|BRWD1-AS1|BRWD1-AS2|C21orf58|C2CD2|CBS|CFAP410|COL18A1|COL18A1-AS1|COL18A1-AS2|COL6A1|COL6A2|COL6A2-DT|CRYAA|CSTB|DIP2A|DIP2A-IT1|DNMT3L|DNMT3L-AS1|DSCAM|DSCAM-AS1|DSCAM-IT1|ERVH48-1|ETS2|ETS2-AS1|FAM3B|FRGCA|FTCD|FTCD-AS1|GATD3|GET1|GET1-SH3BGR|H2BC12L|HMGN1|HSF2BP|ICOSLG|IGSF5|ITGB2|ITGB2-AS1|KRTAP10-1|KRTAP10-10|KRTAP10-11|KR…		See cases	VCV000154214	21	40188323 - 48097372	21	38816399 - 46677460	154214	163965			copy number loss		Pathogenic	2014-03-18	no assertion criteria provided
GRCh38/hg38 21q11.2-22.3(chr21:7749532-46698247)x3	AATBC|ABCG1|ADAMTS1|ADAMTS5|ADARB1|AGPAT3|AIRE|APP|APP-DT|ASMER1|ATP5PF|ATP5PO|B3GALT5|B3GALT5-AS1|BACE2|BACH1|BACH1-IT2|BACH1-IT3|BAGE2|BNAT1|BRWD1|BRWD1-AS1|BRWD1-AS2|BTG3|BTG3-AS1|C21orf140|C21orf58|C21orf91|C21orf91-OT1|C2CD2|CBR1|CBR1-AS1|CBR3|CBR3-AS1|CBS|CCT8|CFAP298|CFAP298-TCP10L|CFAP410|CHAF1B|CHODL|CHODL-AS1|CLDN14|CLDN14-AS1|CLDN17|CLDN8|CLIC6|COL18A1|COL18A1-AS1|COL18A1-AS2|COL6A1|CO…		See cases	VCV000152839	21	14577835 - 48118159	21	7749532 - 46698247	152839	162590			copy number gain		Pathogenic	2011-04-30	no assertion criteria provided
GRCh38/hg38 21q22.2-22.3(chr21:40296025-46670440)x1	AATBC|ABCG1|ADARB1|AGPAT3|AIRE|BACE2|BNAT1|C21orf58|C2CD2|CBS|CFAP410|COL18A1|COL18A1-AS1|COL18A1-AS2|COL6A1|COL6A2|COL6A2-DT|CRYAA|CSTB|DIP2A|DIP2A-IT1|DNMT3L|DNMT3L-AS1|DSCAM|DSCAM-AS1|DSCAM-IT1|ERVH48-1|FAM3B|FRGCA|FTCD|FTCD-AS1|GATD3|H2BC12L|HSF2BP|ICOSLG|ITGB2|ITGB2-AS1|KRTAP10-1|KRTAP10-10|KRTAP10-11|KRTAP10-12|KRTAP10-2|KRTAP10-3|KRTAP10-4|KRTAP10-5|KRTAP10-6|KRTAP10-7|KRTAP10-8|KRTAP10-9|…		See cases	VCV000150275	21	41667952 - 48090352	21	40296025 - 46670440	150275	160026			copy number loss		Pathogenic	2012-09-21	no assertion criteria provided
GRCh38/hg38 21q22.12-22.3(chr21:36066991-46671060)x3	AATBC|ABCG1|ADARB1|AGPAT3|AIRE|B3GALT5|B3GALT5-AS1|BACE2|BNAT1|BRWD1|BRWD1-AS1|BRWD1-AS2|C21orf58|C2CD2|CBR1|CBR1-AS1|CBR3|CBR3-AS1|CBS|CFAP410|CHAF1B|CLDN14|CLDN14-AS1|COL18A1|COL18A1-AS1|COL18A1-AS2|COL6A1|COL6A2|COL6A2-DT|CRYAA|CSTB|DIP2A|DIP2A-IT1|DNMT3L|DNMT3L-AS1|DOP1B|DSCAM|DSCAM-AS1|DSCAM-IT1|DSCR10|DSCR4|DSCR8|DSCR9|DYRK1A|ERG|ERVH48-1|ETS2|ETS2-AS1|FAM3B|FRGCA|FTCD|FTCD-AS1|GATD3|GET1|G…		See cases	VCV000149106	21	37439289 - 48090972	21	36066991 - 46671060	149106	158857			copy number gain		Pathogenic	2012-02-14	no assertion criteria provided
GRCh38/hg38 21q22.13-22.3(chr21:37669628-46671060)x1	AATBC|ABCG1|ADARB1|AGPAT3|AIRE|B3GALT5|B3GALT5-AS1|BACE2|BNAT1|BRWD1|BRWD1-AS1|BRWD1-AS2|C21orf58|C2CD2|CBS|CFAP410|COL18A1|COL18A1-AS1|COL18A1-AS2|COL6A1|COL6A2|COL6A2-DT|CRYAA|CSTB|DIP2A|DIP2A-IT1|DNMT3L|DNMT3L-AS1|DSCAM|DSCAM-AS1|DSCAM-IT1|DSCR10|DSCR4|DSCR8|ERG|ERVH48-1|ETS2|ETS2-AS1|FAM3B|FRGCA|FTCD|FTCD-AS1|GATD3|GET1|GET1-SH3BGR|H2BC12L|HMGN1|HSF2BP|ICOSLG|IGSF5|ITGB2|ITGB2-AS1|KCNJ15|KCNJ…		See cases	VCV000149036	21	39041930 - 48090972	21	37669628 - 46671060	149036	158787			copy number loss		Pathogenic	2012-01-16	no assertion criteria provided
GRCh38/hg38 21q22.3(chr21:41733640-46671060)x1	AATBC|ABCG1|ADARB1|AGPAT3|AIRE|BNAT1|C21orf58|C2CD2|CBS|CFAP410|COL18A1|COL18A1-AS1|COL18A1-AS2|COL6A1|COL6A2|COL6A2-DT|CRYAA|CSTB|DIP2A|DIP2A-IT1|DNMT3L|DNMT3L-AS1|ERVH48-1|FRGCA|FTCD|FTCD-AS1|GATD3|H2BC12L|HSF2BP|ICOSLG|ITGB2|ITGB2-AS1|KRTAP10-1|KRTAP10-10|KRTAP10-11|KRTAP10-12|KRTAP10-2|KRTAP10-3|KRTAP10-4|KRTAP10-5|KRTAP10-6|KRTAP10-7|KRTAP10-8|KRTAP10-9|KRTAP12-1|KRTAP12-2|KRTAP12-3|KRTAP12-…		See cases	VCV000148266	21	43153800 - 48090972	21	41733640 - 46671060	148266	158017			copy number loss		Pathogenic	2011-04-08	no assertion criteria provided
GRCh38/hg38 21p11.2-q22.3(chr21:7749532-46671060)x3	AATBC|ABCG1|ADAMTS1|ADAMTS5|ADARB1|AGPAT3|AIRE|APP|APP-DT|ASMER1|ATP5PF|ATP5PO|B3GALT5|B3GALT5-AS1|BACE2|BACH1|BACH1-IT2|BACH1-IT3|BAGE2|BAGE3|BNAT1|BRWD1|BRWD1-AS1|BRWD1-AS2|BTG3|BTG3-AS1|C21orf140|C21orf58|C21orf91|C21orf91-OT1|C2CD2|CBR1|CBR1-AS1|CBR3|CBR3-AS1|CBS|CCT8|CFAP298|CFAP298-TCP10L|CFAP410|CHAF1B|CHODL|CHODL-AS1|CLDN14|CLDN14-AS1|CLDN17|CLDN8|CLIC6|COL18A1|COL18A1-AS1|COL18A1-AS2|COL…		See cases	VCV000148262	21	10697897 - 48090972	21	7749532 - 46671060	148262	158013			copy number gain		Pathogenic	2011-04-08	no assertion criteria provided
GRCh38/hg38 21p11.2-q22.3(chr21:7749532-46671060)x3	AATBC|ABCG1|ADAMTS1|ADAMTS5|ADARB1|AGPAT3|AIRE|APP|APP-DT|ASMER1|ATP5PF|ATP5PO|B3GALT5|B3GALT5-AS1|BACE2|BACH1|BACH1-IT2|BACH1-IT3|BAGE2|BNAT1|BRWD1|BRWD1-AS1|BRWD1-AS2|BTG3|BTG3-AS1|C21orf140|C21orf58|C21orf91|C21orf91-OT1|C2CD2|CBR1|CBR1-AS1|CBR3|CBR3-AS1|CBS|CCT8|CFAP298|CFAP298-TCP10L|CFAP410|CHAF1B|CHODL|CHODL-AS1|CLDN14|CLDN14-AS1|CLDN17|CLDN8|CLIC6|COL18A1|COL18A1-AS1|COL18A1-AS2|COL6A1|CO…		See cases	VCV000148180	21	35319225 - 48090972	21	7749532 - 46671060	148180	157931			copy number gain		Pathogenic	2012-03-09	no assertion criteria provided
GRCh38/hg38 21q22.13-22.3(chr21:36519173-46670405)x3	AATBC|ABCG1|ADARB1|AGPAT3|AIRE|B3GALT5|B3GALT5-AS1|BACE2|BNAT1|BRWD1|BRWD1-AS1|BRWD1-AS2|C21orf58|C2CD2|CBS|CFAP410|CLDN14|COL18A1|COL18A1-AS1|COL18A1-AS2|COL6A1|COL6A2|COL6A2-DT|CRYAA|CSTB|DIP2A|DIP2A-IT1|DNMT3L|DNMT3L-AS1|DSCAM|DSCAM-AS1|DSCAM-IT1|DSCR10|DSCR4|DSCR8|DSCR9|DYRK1A|ERG|ERVH48-1|ETS2|ETS2-AS1|FAM3B|FRGCA|FTCD|FTCD-AS1|GATD3|GET1|GET1-SH3BGR|H2BC12L|HLCS|HLCS-AS1|HMGN1|HSF2BP|ICOSLG…		See cases	VCV000146921	21	37891471 - 48090317	21	36519173 - 46670405	146921	156672			copy number gain		Pathogenic	2010-10-19	no assertion criteria provided
GRCh38/hg38 21p11.2-q22.3(chr21:7749532-46660999)x3	AATBC|ABCG1|ADAMTS1|ADAMTS5|ADARB1|AGPAT3|AIRE|APP|APP-DT|ASMER1|ATP5PF|ATP5PO|B3GALT5|B3GALT5-AS1|BACE2|BACH1|BACH1-IT2|BACH1-IT3|BAGE2|BNAT1|BRWD1|BRWD1-AS1|BRWD1-AS2|BTG3|BTG3-AS1|C21orf140|C21orf58|C21orf91|C21orf91-OT1|C2CD2|CBR1|CBR1-AS1|CBR3|CBR3-AS1|CBS|CCT8|CFAP298|CFAP298-TCP10L|CFAP410|CHAF1B|CHODL|CHODL-AS1|CLDN14|CLDN14-AS1|CLDN17|CLDN8|CLIC6|COL18A1|COL18A1-AS1|COL18A1-AS2|COL6A1|CO…		See cases	VCV000146125	21	15499847 - 48080911	21	7749532 - 46660999	146125	155876			copy number gain		Pathogenic	2009-07-30	no assertion criteria provided
GRCh38/hg38 21q22.11-22.3(chr21:7749532-46670346)x3	AATBC|ABCG1|ADAMTS1|ADAMTS5|ADARB1|AGPAT3|AIRE|APP|APP-DT|ASMER1|ATP5PF|ATP5PO|B3GALT5|B3GALT5-AS1|BACE2|BACH1|BACH1-IT2|BACH1-IT3|BAGE2|BNAT1|BRWD1|BRWD1-AS1|BRWD1-AS2|BTG3|BTG3-AS1|C21orf140|C21orf58|C21orf91|C21orf91-OT1|C2CD2|CBR1|CBR1-AS1|CBR3|CBR3-AS1|CBS|CCT8|CFAP298|CFAP298-TCP10L|CFAP410|CHAF1B|CHODL|CHODL-AS1|CLDN14|CLDN14-AS1|CLDN17|CLDN8|CLIC6|COL18A1|COL18A1-AS1|COL18A1-AS2|COL6A1|CO…		See cases	VCV000145984	21	34111831 - 48090258	21	7749532 - 46670346	145984	155735			copy number gain		Pathogenic	2010-11-30	no assertion criteria provided
GRCh38/hg38 21p11.2-q22.3(chr21:7749532-46653084)x3	AATBC|ABCG1|ADAMTS1|ADAMTS5|ADARB1|AGPAT3|AIRE|APP|APP-DT|ASMER1|ATP5PF|ATP5PO|B3GALT5|B3GALT5-AS1|BACE2|BACH1|BACH1-IT2|BACH1-IT3|BAGE2|BNAT1|BRWD1|BRWD1-AS1|BRWD1-AS2|BTG3|BTG3-AS1|C21orf140|C21orf58|C21orf91|C21orf91-OT1|C2CD2|CBR1|CBR1-AS1|CBR3|CBR3-AS1|CBS|CCT8|CFAP298|CFAP298-TCP10L|CFAP410|CHAF1B|CHODL|CHODL-AS1|CLDN14|CLDN14-AS1|CLDN17|CLDN8|CLIC6|COL18A1|COL18A1-AS1|COL18A1-AS2|COL6A1|CO…		See cases	VCV000145332	21	15485038 - 48072996	21	7749532 - 46653084	145332	155083			copy number gain		Pathogenic	2010-11-30	no assertion criteria provided
GRCh38/hg38 21q22.3(chr21:43071168-46670405)x1	AATBC|ADARB1|AGPAT3|AIRE|BNAT1|C21orf58|CBS|CFAP410|COL18A1|COL18A1-AS1|COL18A1-AS2|COL6A1|COL6A2|COL6A2-DT|CRYAA|CSTB|DIP2A|DIP2A-IT1|DNMT3L|DNMT3L-AS1|FRGCA|FTCD|FTCD-AS1|GATD3|H2BC12L|HSF2BP|ICOSLG|ITGB2|ITGB2-AS1|KRTAP10-1|KRTAP10-10|KRTAP10-11|KRTAP10-12|KRTAP10-2|KRTAP10-3|KRTAP10-4|KRTAP10-5|KRTAP10-6|KRTAP10-7|KRTAP10-8|KRTAP10-9|KRTAP12-1|KRTAP12-2|KRTAP12-3|KRTAP12-4|LINC00163|LINC00165…		See cases	VCV000144193	21	44491278 - 48090317	21	43071168 - 46670405	144193	153944			copy number loss		Pathogenic	2010-05-27	no assertion criteria provided
GRCh38/hg38 21p11.2-q22.3(chr21:7749532-46670405)x3	AATBC|ABCG1|ADAMTS1|ADAMTS5|ADARB1|AGPAT3|AIRE|APP|APP-DT|ASMER1|ATP5PF|ATP5PO|B3GALT5|B3GALT5-AS1|BACE2|BACH1|BACH1-IT2|BACH1-IT3|BAGE2|BNAT1|BRWD1|BRWD1-AS1|BRWD1-AS2|BTG3|BTG3-AS1|C21orf140|C21orf58|C21orf91|C21orf91-OT1|C2CD2|CBR1|CBR1-AS1|CBR3|CBR3-AS1|CBS|CCT8|CFAP298|CFAP298-TCP10L|CFAP410|CHAF1B|CHODL|CHODL-AS1|CLDN14|CLDN14-AS1|CLDN17|CLDN8|CLIC6|COL18A1|COL18A1-AS1|COL18A1-AS2|COL6A1|CO…		See cases	VCV000059247	21	34423268 - 48090317	21	7749532 - 46670405	59247	73842			copy number gain		Pathogenic	2011-08-12	criteria provided, single submitter
GRCh38/hg38 21p11.2-q22.3(chr21:7749532-46653090)x3	AATBC|ABCG1|ADAMTS1|ADAMTS5|ADARB1|AGPAT3|AIRE|APP|APP-DT|ASMER1|ATP5PF|ATP5PO|B3GALT5|B3GALT5-AS1|BACE2|BACH1|BACH1-IT2|BACH1-IT3|BAGE2|BNAT1|BRWD1|BRWD1-AS1|BRWD1-AS2|BTG3|BTG3-AS1|C21orf140|C21orf58|C21orf91|C21orf91-OT1|C2CD2|CBR1|CBR1-AS1|CBR3|CBR3-AS1|CBS|CCT8|CFAP298|CFAP298-TCP10L|CFAP410|CHAF1B|CHODL|CHODL-AS1|CLDN14|CLDN14-AS1|CLDN17|CLDN8|CLIC6|COL18A1|COL18A1-AS1|COL18A1-AS2|COL6A1|CO…		See cases	VCV000059222	21	14539679 - 48073002	21	7749532 - 46653090	59222	73817			copy number gain		Pathogenic	2011-08-12	criteria provided, single submitter
GRCh38/hg38 21p11.2-q22.3(chr21:7749532-46623792)x3	AATBC|ABCG1|ADAMTS1|ADAMTS5|ADARB1|AGPAT3|AIRE|APP|APP-DT|ASMER1|ATP5PF|ATP5PO|B3GALT5|B3GALT5-AS1|BACE2|BACH1|BACH1-IT2|BACH1-IT3|BAGE2|BNAT1|BRWD1|BRWD1-AS1|BRWD1-AS2|BTG3|BTG3-AS1|C21orf140|C21orf58|C21orf91|C21orf91-OT1|C2CD2|CBR1|CBR1-AS1|CBR3|CBR3-AS1|CBS|CCT8|CFAP298|CFAP298-TCP10L|CFAP410|CHAF1B|CHODL|CHODL-AS1|CLDN14|CLDN14-AS1|CLDN17|CLDN8|CLIC6|COL18A1|COL18A1-AS1|COL18A1-AS2|COL6A1|CO…		See cases	VCV000059221	21	14524963 - 48043704	21	7749532 - 46623792	59221	73816			copy number gain		Pathogenic	2011-08-12	criteria provided, single submitter
GRCh37/hg19 21q11.2-22.3(chr21:15380398-48100790)x3	ABCG1|ADAMTS1|ADAMTS5|ADARB1|AGPAT3|AIRE|APP|ATP5PF|ATP5PO|B3GALT5|BACE2|BACH1|BRWD1|BTG3|C21orf58|C21orf91|C2CD2|CBR1|CBR3|CBS|CCT8|CFAP298|CFAP410|CHAF1B|CHODL|CLDN14|CLDN17|CLDN8|CLIC6|COL18A1|COL6A1|COL6A2|CRYAA|CRYZL1|CSTB|CXADR|CYYR1|DIP2A|DNAJC28|DNMT3L|DONSON|DOP1B|DSCAM|DSCR4|DSCR8|DYRK1A|EPCIP|ERG|ETS2|EVA1C|FAM3B|FTCD|GABPA|GART|GATD3|GET1|GRIK1|HLCS|HMGN1|HSF2BP|HSPA13|HUNK|ICOSLG|IFN…		not provided	VCV003242283	21	15380398 - 48100790			3242283	3401258			copy number gain		Pathogenic	2021-04-22	criteria provided, single submitter
GRCh37/hg19 21q11.2-22.3(chr21:15023401-48097372)x3	ABCG1|ADAMTS1|ADAMTS5|ADARB1|AGPAT3|AIRE|APP|ATP5PF|ATP5PO|B3GALT5|BACE2|BACH1|BRWD1|BTG3|C21orf58|C21orf91|C2CD2|CBR1|CBR3|CBS|CCT8|CFAP298|CFAP410|CHAF1B|CHODL|CLDN14|CLDN17|CLDN8|CLIC6|COL18A1|COL6A1|COL6A2|CRYAA|CRYZL1|CSTB|CXADR|CYYR1|DIP2A|DNAJC28|DNMT3L|DONSON|DOP1B|DSCAM|DSCR4|DSCR8|DYRK1A|EPCIP|ERG|ETS2|EVA1C|FAM3B|FTCD|GABPA|GART|GATD3|GET1|GRIK1|HLCS|HMGN1|HSF2BP|HSPA13|HUNK|ICOSLG|IFN…		not specified	VCV003062431	21	15023401 - 48097372			3062431	3222655			copy number gain		Pathogenic		criteria provided, single submitter
GRCh37/hg19 21q21.3-22.3(chr21:26929299-48097372)x3	ABCG1|ADAMTS1|ADAMTS5|ADARB1|AGPAT3|AIRE|APP|ATP5PF|ATP5PO|B3GALT5|BACE2|BACH1|BRWD1|C21orf58|C2CD2|CBR1|CBR3|CBS|CCT8|CFAP298|CFAP410|CHAF1B|CLDN14|CLDN17|CLDN8|CLIC6|COL18A1|COL6A1|COL6A2|CRYAA|CRYZL1|CSTB|CYYR1|DIP2A|DNAJC28|DNMT3L|DONSON|DOP1B|DSCAM|DSCR4|DSCR8|DYRK1A|EPCIP|ERG|ETS2|EVA1C|FAM3B|FTCD|GABPA|GART|GATD3|GET1|GRIK1|HLCS|HMGN1|HSF2BP|HUNK|ICOSLG|IFNAR1|IFNAR2|IFNGR2|IGSF5|IL10RB|IT…		not specified	VCV003062423	21	26929299 - 48097372			3062423	3222647			copy number gain		Pathogenic		criteria provided, single submitter
GRCh37/hg19 21q21.3-22.3(chr21:30685776-48097372)x3	ABCG1|ADARB1|AGPAT3|AIRE|ATP5PO|B3GALT5|BACE2|BACH1|BRWD1|C21orf58|C2CD2|CBR1|CBR3|CBS|CFAP298|CFAP410|CHAF1B|CLDN14|CLDN17|CLDN8|CLIC6|COL18A1|COL6A1|COL6A2|CRYAA|CRYZL1|CSTB|DIP2A|DNAJC28|DNMT3L|DONSON|DOP1B|DSCAM|DSCR4|DSCR8|DYRK1A|EPCIP|ERG|ETS2|EVA1C|FAM3B|FTCD|GART|GATD3|GET1|GRIK1|HLCS|HMGN1|HSF2BP|HUNK|ICOSLG|IFNAR1|IFNAR2|IFNGR2|IGSF5|IL10RB|ITGB2|ITSN1|KCNE1|KCNE2|KCNJ15|KCNJ6|KRTAP10-1…		not specified	VCV003062420	21	30685776 - 48097372			3062420	3222644			copy number gain		Pathogenic		criteria provided, single submitter
GRCh37/hg19 21q22.2-22.3(chr21:40681179-48097372)x1	ABCG1|ADARB1|AGPAT3|AIRE|B3GALT5|BACE2|BRWD1|C21orf58|C2CD2|CBS|CFAP410|COL18A1|COL6A1|COL6A2|CRYAA|CSTB|DIP2A|DNMT3L|DSCAM|FAM3B|FTCD|GATD3|GET1|HMGN1|HSF2BP|ICOSLG|IGSF5|ITGB2|KRTAP10-1|KRTAP10-10|KRTAP10-11|KRTAP10-12|KRTAP10-2|KRTAP10-3|KRTAP10-4|KRTAP10-5|KRTAP10-6|KRTAP10-7|KRTAP10-8|KRTAP10-9|KRTAP12-1|KRTAP12-2|KRTAP12-3|KRTAP12-4|LCA5L|LINC00163|LINC00315|LINC00334|LRRC3|LSS|MCM3AP|MX1|M…		not provided	VCV002685664	21	40681179 - 48097372			2685664	2846699			copy number loss		Pathogenic	2022-11-09	criteria provided, single submitter
GRCh37/hg19 21q22.3(chr21:43687354-48097372)x3	ABCG1|ADARB1|AGPAT3|AIRE|C21orf58|CBS|CFAP410|COL18A1|COL6A1|COL6A2|CRYAA|CSTB|DIP2A|DNMT3L|FTCD|GATD3|HSF2BP|ICOSLG|ITGB2|KRTAP10-1|KRTAP10-10|KRTAP10-11|KRTAP10-12|KRTAP10-2|KRTAP10-3|KRTAP10-4|KRTAP10-5|KRTAP10-6|KRTAP10-7|KRTAP10-8|KRTAP10-9|KRTAP12-1|KRTAP12-2|KRTAP12-3|KRTAP12-4|LINC00163|LINC00315|LINC00334|LRRC3|LSS|MCM3AP|NDUFV3|PCBP3|PCNT|PDE9A|PDXK|PFKL|PKNOX1|POFUT2|PRMT2|PTTG1IP|PWP2…		not provided	VCV002684917	21	43687354 - 48097372			2684917	2845952			copy number gain		Likely pathogenic	2023-05-06	criteria provided, single submitter
GRCh37/hg19 21q22.11-22.3(chr21:33015681-48097372)x3	ABCG1|ADARB1|AGPAT3|AIRE|ATP5PO|B3GALT5|BACE2|BRWD1|C21orf58|C2CD2|CBR1|CBR3|CBS|CFAP298|CFAP410|CHAF1B|CLDN14|CLIC6|COL18A1|COL6A1|COL6A2|CRYAA|CRYZL1|CSTB|DIP2A|DNAJC28|DNMT3L|DONSON|DOP1B|DSCAM|DSCR4|DSCR8|DYRK1A|EPCIP|ERG|ETS2|EVA1C|FAM3B|FTCD|GART|GATD3|GET1|HLCS|HMGN1|HSF2BP|HUNK|ICOSLG|IFNAR1|IFNAR2|IFNGR2|IGSF5|IL10RB|ITGB2|ITSN1|KCNE1|KCNE2|KCNJ15|KCNJ6|KRTAP10-1|KRTAP10-10|KRTAP10-11|KR…		not provided	VCV002684914	21	33015681 - 48097372			2684914	2845949			copy number gain		Pathogenic	2023-04-20	criteria provided, single submitter
NC_000021.8:g.(?_43160998)_(47754702_?)del	ABCG1|ADARB1|C21orf58|CBS|CFAP410|COL6A2|CRYAA|C2CD2|COL18A1|COL6A1|AGPAT3|AIRE|CSTB|DNMT3L|FTCD|GATD3|HSF2BP|ICOSLG|ITGB2|KRTAP10-1|KRTAP10-10|KRTAP10-11|KRTAP10-12|KRTAP10-2|KRTAP10-3|KRTAP10-4|KRTAP10-5|KRTAP10-6|KRTAP10-7|KRTAP10-8|KRTAP10-9|KRTAP12-1|KRTAP12-2|KRTAP12-3|KRTAP12-4|LINC00163|LINC00315|LINC00334|LRRC3|LSS|MCM3AP|NDUFV3|PCBP3|PCNT|PDE9A|PDXK|PFKL|PKNOX1|POFUT2|PRDM15|PTTG1IP|PWP…		Progressive myoclonic epilepsy|Developmental and epileptic encephalopathy, 30	VCV002422361	21	43160998 - 47754702			2422361	1942396			Deletion		Conflicting classifications of pathogenicity	2022-10-28	criteria provided, conflicting classifications
GRCh37/hg19 21q11.2-22.3(chr21:14420615-48080926)x3	ABCG1|ADAMTS1|ADAMTS5|ADARB1|AGPAT3|AIRE|APP|ATP5PF|ATP5PO|B3GALT5|BACE2|BACH1|BRWD1|BTG3|C21orf58|C21orf91|C2CD2|CBR1|CBR3|CBS|CCT8|CFAP298|CFAP410|CHAF1B|CHODL|CLDN14|CLDN17|CLDN8|CLIC6|COL18A1|COL6A1|COL6A2|CRYAA|CRYZL1|CSTB|CXADR|CYYR1|DIP2A|DNAJC28|DNMT3L|DONSON|DOP1B|DSCAM|DSCR4|DSCR8|DYRK1A|EPCIP|ERG|ETS2|EVA1C|FAM3B|FTCD|GABPA|GART|GATD3|GET1|GRIK1|HLCS|HMGN1|HSF2BP|HSPA13|HUNK|ICOSLG|IFN…		Down syndrome	VCV001705932	21	14420615 - 48080926			1705932	1704252			copy number gain		Pathogenic		no assertion criteria provided
GRCh37/hg19 21q22.3(chr21:42679089-48097372)	ABCG1|ADARB1|AGPAT3|AIRE|C21orf58|C2CD2|CBS|CFAP410|COL18A1|COL6A1|COL6A2|CRYAA|CSTB|DIP2A|DNMT3L|FAM3B|FTCD|GATD3|HSF2BP|ICOSLG|ITGB2|KRTAP10-1|KRTAP10-10|KRTAP10-11|KRTAP10-12|KRTAP10-2|KRTAP10-3|KRTAP10-4|KRTAP10-5|KRTAP10-6|KRTAP10-7|KRTAP10-8|KRTAP10-9|KRTAP12-1|KRTAP12-2|KRTAP12-3|KRTAP12-4|LINC00163|LINC00315|LINC00334|LRRC3|LSS|MCM3AP|MX1|MX2|NDUFV3|PCBP3|PCNT|PDE9A|PDXK|PFKL|PKNOX1|POFUT…		Delayed speech and language development	VCV001703616	21	42679089 - 48097372			1703616	1696007			copy number loss		Pathogenic		no assertion criteria provided
GRCh37/hg19 21q22.2-22.3(chr21:42410406-48097372)	ABCG1|ADARB1|AGPAT3|AIRE|BACE2|C21orf58|C2CD2|CBS|CFAP410|COL18A1|COL6A1|COL6A2|CRYAA|CSTB|DIP2A|DNMT3L|FAM3B|FTCD|GATD3|HSF2BP|ICOSLG|ITGB2|KRTAP10-1|KRTAP10-10|KRTAP10-11|KRTAP10-12|KRTAP10-2|KRTAP10-3|KRTAP10-4|KRTAP10-5|KRTAP10-6|KRTAP10-7|KRTAP10-8|KRTAP10-9|KRTAP12-1|KRTAP12-2|KRTAP12-3|KRTAP12-4|LINC00163|LINC00315|LINC00334|LRRC3|LSS|MCM3AP|MX1|MX2|NDUFV3|PCBP3|PCNT|PDE9A|PDXK|PFKL|PKNOX1…		not specified	VCV001526720	21	42410406 - 48097372			1526720	1518209			copy number loss		Pathogenic	2022-03-01	criteria provided, single submitter
NC_000021.8:g.(?_43160998)_(47865240_?)del	ABCG1|ADARB1|AGPAT3|AIRE|C21orf58|C2CD2|CBS|CFAP410|COL18A1|COL6A1|COL6A2|CRYAA|CSTB|DNMT3L|FTCD|GATD3|HSF2BP|ICOSLG|ITGB2|KRTAP10-1|KRTAP10-10|KRTAP10-11|KRTAP10-12|KRTAP10-2|KRTAP10-3|KRTAP10-4|KRTAP10-5|KRTAP10-6|KRTAP10-7|KRTAP10-8|KRTAP10-9|KRTAP12-1|KRTAP12-2|KRTAP12-3|KRTAP12-4|LINC00163|LINC00315|LINC00334|LRRC3|LSS|MCM3AP|NDUFV3|PCBP3|PCNT|PDE9A|PDXK|PFKL|PKNOX1|POFUT2|PRDM15|PTTG1IP|PWP…		HYPERHOMOCYSTEINEMIA, THROMBOTIC, CBS-RELATED	VCV001458311	21	43160998 - 47865240			1458311	1468026			Deletion		Pathogenic	2021-07-30	criteria provided, single submitter
GRCh37/hg19 21q11.2-22.3(chr21:15006457-48097372)x3	ABCG1|ADAMTS1|ADAMTS5|ADARB1|AGPAT3|AIRE|APP|ATP5PF|ATP5PO|B3GALT5|BACE2|BACH1|BRWD1|BTG3|C21orf58|C21orf91|C2CD2|CBR1|CBR3|CBS|CCT8|CFAP298|CFAP410|CHAF1B|CHODL|CLDN14|CLDN17|CLDN8|CLIC6|COL18A1|COL6A1|COL6A2|CRYAA|CRYZL1|CSTB|CXADR|CYYR1|DIP2A|DNAJC28|DNMT3L|DONSON|DOP1B|DSCAM|DSCR4|DSCR8|DYRK1A|EPCIP|ERG|ETS2|EVA1C|FAM3B|FTCD|GABPA|GART|GATD3|GET1|GRIK1|HLCS|HMGN1|HSF2BP|HSPA13|HUNK|ICOSLG|IFN…		not provided	VCV001341200	21	15006457 - 48097372			1341200	1332408			copy number gain		Pathogenic	2020-08-06	no assertion criteria provided
GRCh37/hg19 21q11.2-22.3(chr21:14629063-48090317)x3	ABCG1|ADAMTS1|ADAMTS5|ADARB1|AGPAT3|AIRE|APP|ATP5PF|ATP5PO|B3GALT5|BACE2|BACH1|BRWD1|BTG3|C21orf58|C21orf91|C2CD2|CBR1|CBR3|CBS|CCT8|CFAP298|CFAP410|CHAF1B|CHODL|CLDN14|CLDN17|CLDN8|CLIC6|COL18A1|COL6A1|COL6A2|CRYAA|CRYZL1|CSTB|CXADR|CYYR1|DIP2A|DNAJC28|DNMT3L|DONSON|DOP1B|DSCAM|DSCR4|DSCR8|DYRK1A|EPCIP|ERG|ETS2|EVA1C|FAM3B|FTCD|GABPA|GART|GATD3|GET1|GRIK1|HLCS|HMGN1|HSF2BP|HSPA13|HUNK|ICOSLG|IFN…		See cases	VCV000983157	21	14629063 - 48090317			983157	971242			copy number gain		Pathogenic	2020-09-03	no assertion criteria provided
GRCh37/hg19 21q22.2-22.3(chr21:42044877-48100155)x3	ABCG1|ADARB1|AGPAT3|AIRE|BACE2|C21orf58|C2CD2|CBS|CFAP410|COL18A1|COL6A1|COL6A2|CRYAA|CSTB|DIP2A|DNMT3L|DSCAM|FAM3B|FTCD|GATD3|HSF2BP|ICOSLG|ITGB2|KRTAP10-1|KRTAP10-10|KRTAP10-11|KRTAP10-12|KRTAP10-2|KRTAP10-3|KRTAP10-4|KRTAP10-5|KRTAP10-6|KRTAP10-7|KRTAP10-8|KRTAP10-9|KRTAP12-1|KRTAP12-2|KRTAP12-3|KRTAP12-4|LINC00163|LINC00315|LINC00334|LRRC3|LSS|MCM3AP|MX1|MX2|NDUFV3|PCBP3|PCNT|PDE9A|PDXK|PFKL|…		See cases	VCV000816508	21	42044877 - 48100155			816508	804713			copy number gain		Pathogenic	2018-02-23	criteria provided, single submitter
GRCh37/hg19 21q22.3(chr21:43472147-48097372)x1	ABCG1|ADARB1|AGPAT3|AIRE|C21orf58|CBS|CFAP410|COL18A1|COL6A1|COL6A2|CRYAA|CSTB|DIP2A|DNMT3L|FTCD|GATD3|HSF2BP|ICOSLG|ITGB2|KRTAP10-1|KRTAP10-10|KRTAP10-11|KRTAP10-12|KRTAP10-2|KRTAP10-3|KRTAP10-4|KRTAP10-5|KRTAP10-6|KRTAP10-7|KRTAP10-8|KRTAP10-9|KRTAP12-1|KRTAP12-2|KRTAP12-3|KRTAP12-4|LINC00163|LINC00315|LINC00334|LRRC3|LSS|MCM3AP|NDUFV3|PCBP3|PCNT|PDE9A|PDXK|PFKL|PKNOX1|POFUT2|PRMT2|PTTG1IP|PWP2…		not provided	VCV000816172	21	43472147 - 48097372			816172	804380			copy number loss		Pathogenic	2018-10-23	no assertion criteria provided
Single allele	ABCG1|ADARB1|AGPAT3|AIRE|C21orf58|C2CD2|CBS|CFAP410|COL18A1|COL6A1|COL6A2|CRYAA|CSTB|DIP2A|DNMT3L|FTCD|GATD3|HSF2BP|ICOSLG|ITGB2|KRTAP10-1|KRTAP10-10|KRTAP10-11|KRTAP10-12|KRTAP10-2|KRTAP10-3|KRTAP10-4|KRTAP10-5|KRTAP10-6|KRTAP10-7|KRTAP10-8|KRTAP10-9|KRTAP12-1|KRTAP12-2|KRTAP12-3|KRTAP12-4|LINC00163|LINC00315|LINC00334|LRRC3|LSS|MCM3AP|NDUFV3|PCBP3|PCNT|PDE9A|PDXK|PFKL|PKNOX1|POFUT2|PRDM15|PRMT2…		not provided	VCV000626294	21	43010560 - 48093051			626294	614623			Duplication		Likely pathogenic		no assertion criteria provided
GRCh37/hg19 21q22.2-22.3(chr21:41537095-46914745)	ABCG1|ADARB1|AGPAT3|AIRE|BACE2|C2CD2|CBS|CFAP410|COL18A1|CRYAA|CSTB|DNMT3L|DSCAM|FAM3B|GATD3|HSF2BP|ICOSLG|ITGB2|KRTAP10-1|KRTAP10-10|KRTAP10-11|KRTAP10-12|KRTAP10-2|KRTAP10-3|KRTAP10-4|KRTAP10-5|KRTAP10-6|KRTAP10-7|KRTAP10-8|KRTAP10-9|KRTAP12-1|KRTAP12-2|KRTAP12-3|KRTAP12-4|LINC00163|LINC00315|LINC00334|LRRC3|MX1|MX2|NDUFV3|PDE9A|PDXK|PFKL|PKNOX1|PLAC4|POFUT2|PRDM15|PTTG1IP|PWP2|RIPK4|RRP1|RRP1B…		not provided	VCV000625618	21	41537095 - 46914745			625618	613922			copy number loss		Pathogenic	2018-11-01	criteria provided, single submitter
GRCh37/hg19 21q22.2-22.3(chr21:42335622-48097372)x1	ABCG1|KRTAP10-1|KRTAP10-10|KRTAP10-9|LRRC3|POFUT2|PRDM15|RSPH1|S100B|TFF3|YBEY|ZBTB21|PRMT2|RRP1B|PTTG1IP|PWP2|RIPK4|RRP1|SIK1|SLC19A1|SLC37A1|SLX9|SPATC1L|SUMO3|TFF1|TFF2|TMPRSS2|TMPRSS3|KRTAP12-1|KRTAP10-2|KRTAP10-3|KRTAP10-4|KRTAP10-5|KRTAP10-6|KRTAP10-7|KRTAP10-8|KRTAP12-2|KRTAP12-3|KRTAP12-4|LINC00163|LINC00315|LINC00334|UMODL1|WDR4|PCNT|PDE9A|PLAC4|PDXK|PFKL|CFAP410|PKNOX1|COL18A1|COL6A1|CO…		not provided	VCV000564676	21	42335622 - 48097372			564676	555860			copy number loss		Pathogenic	2023-11-22	criteria provided, single submitter
GRCh37/hg19 21q22.3(chr21:43687353-48097372)x1	ABCG1|ADARB1|AGPAT3|AIRE|C21orf58|CBS|CFAP410|COL18A1|COL6A1|COL6A2|CRYAA|CSTB|DIP2A|DNMT3L|FTCD|GATD3|HSF2BP|ICOSLG|ITGB2|KRTAP10-1|KRTAP10-10|KRTAP10-11|KRTAP10-12|KRTAP10-2|KRTAP10-3|KRTAP10-4|KRTAP10-5|KRTAP10-6|KRTAP10-7|KRTAP10-8|KRTAP10-9|KRTAP12-1|KRTAP12-2|KRTAP12-3|KRTAP12-4|LINC00163|LINC00315|LINC00334|LRRC3|LSS|MCM3AP|NDUFV3|PCBP3|PCNT|PDE9A|PDXK|PFKL|PKNOX1|POFUT2|PRMT2|PTTG1IP|PWP2…		not provided	VCV000564674	21	43687353 - 48097372			564674	555858			copy number loss		Pathogenic	2018-01-09	no assertion criteria provided
GRCh37/hg19 21q11.2-22.3(chr21:15006458-48097372)	ABCG1|ADAMTS1|ADAMTS5|ADARB1|AGPAT3|AIRE|APP|ATP5PF|ATP5PO|B3GALT5|BACE2|BACH1|BRWD1|BTG3|C21orf58|C21orf91|C2CD2|CBR1|CBR3|CBS|CCT8|CFAP298|CFAP410|CHAF1B|CHODL|CLDN14|CLDN17|CLDN8|CLIC6|COL18A1|COL6A1|COL6A2|CRYAA|CRYZL1|CSTB|CXADR|CYYR1|DIP2A|DNAJC28|DNMT3L|DONSON|DOP1B|DSCAM|DSCR4|DSCR8|DYRK1A|EPCIP|ERG|ETS2|EVA1C|FAM3B|FTCD|GABPA|GART|GATD3|GET1|GRIK1|HLCS|HMGN1|HSF2BP|HSPA13|HUNK|ICOSLG|IFN…		See cases	VCV000443979	21	15006458 - 48097372			443979	437641			copy number gain		Pathogenic	2015-07-14	no assertion criteria provided
GRCh37/hg19 21q22.13-22.3(chr21:37914123-48097372)x1	ABCG1|ADARB1|AGPAT3|AIRE|B3GALT5|BACE2|BRWD1|C21orf58|C2CD2|CBS|CFAP410|CLDN14|COL18A1|COL6A1|COL6A2|CRYAA|CSTB|DIP2A|DNMT3L|ETS2|DSCAM|DSCR4|DSCR8|DYRK1A|ERG|FAM3B|FTCD|GATD3|GET1|HLCS|HMGN1|HSF2BP|ICOSLG|IGSF5|ITGB2|KCNJ15|KCNJ6|KRTAP10-1|KRTAP10-10|KRTAP10-11|KRTAP10-12|KRTAP10-2|KRTAP10-3|KRTAP10-4|KRTAP10-5|KRTAP10-6|KRTAP10-7|KRTAP10-8|KRTAP10-9|KRTAP12-1|KRTAP12-2|KRTAP12-3|KRTAP12-4|LCA5L…		See cases	VCV000443778	21	37914123 - 48097372			443778	437440			copy number loss		Pathogenic	2013-11-12	no assertion criteria provided
GRCh37/hg19 21q22.3(chr21:43498966-48097372)x1	ABCG1|ADARB1|AGPAT3|AIRE|C21orf58|CBS|CFAP410|COL18A1|COL6A1|COL6A2|CRYAA|CSTB|DIP2A|DNMT3L|FTCD|GATD3|HSF2BP|ICOSLG|ITGB2|KRTAP10-1|KRTAP10-10|KRTAP10-11|KRTAP10-12|KRTAP10-2|KRTAP10-3|KRTAP10-4|KRTAP10-5|KRTAP10-6|KRTAP10-7|KRTAP10-8|KRTAP10-9|KRTAP12-1|KRTAP12-2|KRTAP12-3|KRTAP12-4|LINC00163|LINC00315|LINC00334|LRRC3|LSS|MCM3AP|NDUFV3|PCBP3|PCNT|PDE9A|PDXK|PFKL|PKNOX1|POFUT2|PRMT2|PTTG1IP|PWP2…		See cases	VCV000443167	21	43498966 - 48097372			443167	436829			copy number loss		Pathogenic	2014-06-03	no assertion criteria provided
GRCh37/hg19 21q22.2-22.3(chr21:41254101-48097372)x1	ABCG1|ADARB1|AGPAT3|AIRE|BACE2|C21orf58|C2CD2|CBS|CFAP410|COL18A1|COL6A1|COL6A2|CRYAA|CSTB|DIP2A|DNMT3L|DSCAM|FAM3B|FTCD|GATD3|HSF2BP|ICOSLG|ITGB2|KRTAP10-1|KRTAP10-10|KRTAP10-11|KRTAP10-12|KRTAP10-2|KRTAP10-3|KRTAP10-4|KRTAP10-5|KRTAP10-6|KRTAP10-7|KRTAP10-8|KRTAP10-9|KRTAP12-1|KRTAP12-2|KRTAP12-3|KRTAP12-4|LINC00163|LINC00315|LINC00334|LRRC3|LSS|MCM3AP|MX1|MX2|NDUFV3|PCBP3|PCNT|PCP4|PDE9A|PDXK|…		See cases	VCV000443072	21	41254101 - 48097372			443072	436734			copy number loss		Pathogenic	2014-04-22	no assertion criteria provided
GRCh37/hg19 21q22.13-22.3(chr21:38699545-48097372)x1	ABCG1|ADARB1|AGPAT3|AIRE|B3GALT5|BACE2|BRWD1|C21orf58|C2CD2|CBS|CFAP410|COL18A1|COL6A1|COL6A2|CRYAA|CSTB|DIP2A|DNMT3L|DSCAM|DSCR4|DSCR8|DYRK1A|ERG|ETS2|FAM3B|FTCD|GATD3|GET1|HMGN1|HSF2BP|ICOSLG|IGSF5|ITGB2|KCNJ15|KCNJ6|KRTAP10-1|KRTAP10-10|KRTAP10-11|KRTAP10-12|KRTAP10-2|KRTAP10-3|KRTAP10-4|KRTAP10-5|KRTAP10-6|KRTAP10-7|KRTAP10-8|KRTAP10-9|KRTAP12-1|KRTAP12-2|KRTAP12-3|KRTAP12-4|LCA5L|LINC00114|L…		See cases	VCV000443002	21	38699545 - 48097372			443002	436664			copy number loss		Pathogenic	2015-04-19	no assertion criteria provided
GRCh37/hg19 21q11.2-22.3(chr21:15538655-48080926)x1	ABCG1|ADAMTS1|ADAMTS5|ADARB1|AGPAT3|AIRE|APP|ATP5PF|ATP5PO|B3GALT5|BACE2|BACH1|BRWD1|BTG3|C21orf58|C21orf91|C2CD2|CBR1|CBR3|CBS|CCT8|CFAP298|CFAP410|CHAF1B|CHODL|CLDN14|CLDN17|CLDN8|CLIC6|COL18A1|COL6A1|COL6A2|CRYAA|CRYZL1|CSTB|CXADR|CYYR1|DIP2A|DNAJC28|DNMT3L|DONSON|DOP1B|DSCAM|DSCR4|DSCR8|DYRK1A|EPCIP|ERG|ETS2|EVA1C|FAM3B|FTCD|GABPA|GART|GATD3|GET1|GRIK1|HLCS|HMGN1|HSF2BP|HSPA13|HUNK|ICOSLG|IFN…		See cases	VCV000253512	21	15538655 - 48080926			253512	247960			copy number loss		Pathogenic	2016-01-20	criteria provided, single submitter
GRCh37/hg19 21q11.2-22.3(chr21:15410701-48090317)x3	ABCG1|ADAMTS1|ADAMTS5|ADARB1|AGPAT3|AIRE|APP|ATP5PF|ATP5PO|B3GALT5|BACE2|BACH1|BRWD1|BTG3|C21orf58|C21orf91|C2CD2|CBR1|CBR3|CBS|CCT8|CFAP298|CFAP410|CHAF1B|CHODL|CLDN14|CLDN17|CLDN8|CLIC6|COL18A1|COL6A1|COL6A2|CRYAA|CRYZL1|CSTB|CXADR|CYYR1|DIP2A|DNAJC28|DNMT3L|DONSON|DOP1B|DSCAM|DSCR4|DSCR8|DYRK1A|EPCIP|ERG|ETS2|EVA1C|FAM3B|FTCD|GABPA|GART|GATD3|GET1|GRIK1|HLCS|HMGN1|HSF2BP|HSPA13|HUNK|ICOSLG|IFN…		See cases	VCV000253403	21	15410701 - 48090317			253403	247851			copy number gain		Pathogenic	2016-01-20	criteria provided, single submitter
GRCh37/hg19 21q11.2-22.3(chr21:15285841-48097372)	ADAMTS1|ADAMTS5|KRTAP12-4|KRTAP13-1|RBM11|SH3BGR|SIK1|TFF2|SLC37A1|KRTAP20-3|KRTAP13-4|KRTAP15-1|KRTAP19-1|KRTAP19-6|KRTAP19-7|KRTAP19-8|KRTAP20-1|SMIM11|SOD1|TFF3|TIAM1|TMEM50B|SIM2|SLC19A1|SLC5A3|SLX9|ADARB1|AGPAT3|C21orf91|C2CD2|CBR1|CFAP298|CFAP410|CHAF1B|CHODL|CLDN14|BTG3|C21orf58|CBR3|CBS|CCT8|AIRE|BRWD1|KRTAP13-2|KRTAP13-3|KRTAP19-2|KRTAP19-3|KRTAP19-4|KRTAP19-5|KRTAP20-2|ABCG1|APP|ATP5PF|…		not specified	VCV001526706	21	15285841 - 48097372			1526706	1518195			copy number gain		Pathogenic	2022-03-01	criteria provided, single submitter
NM_001112.4(ADARB1):c.59G>A (p.Arg20His)	ADARB1	R20H, R69H	Inborn genetic diseases	VCV002463880	21	46595675	21	45175760	2463880	2439860		NC_000021.9:45175759:G:A	single nucleotide variant	missense variant|non-coding transcript variant	Uncertain significance	2023-01-17	criteria provided, single submitter
NM_001112.4(ADARB1):c.134G>A (p.Gly45Asp)	ADARB1	G45D, G94D	Inborn genetic diseases	VCV003268735	21	46595750	21	45175835	3268735	3423104		NC_000021.9:45175834:G:A	single nucleotide variant	missense variant|non-coding transcript variant	Uncertain significance	2024-05-02	criteria provided, single submitter
NM_001112.4(ADARB1):c.139G>C (p.Gly47Arg)	ADARB1	G47R, G96R	not provided	VCV001803325	21	46595755	21	45175840	1803325	1860353		NC_000021.9:45175839:G:C	single nucleotide variant	missense variant|non-coding transcript variant	Uncertain significance	2022-06-08	criteria provided, single submitter
NM_001112.4(ADARB1):c.196C>T (p.Arg66Cys)	ADARB1	R115C, R66C	Neurodevelopmental disorder with hypotonia, microcephaly, and seizures	VCV002438868	21	46595812	21	45175897	2438868	2414550		NC_000021.9:45175896:C:T	single nucleotide variant	missense variant|non-coding transcript variant	Uncertain significance	2022-09-15	criteria provided, single submitter
NM_001112.4(ADARB1):c.233T>G (p.Leu78Arg)	ADARB1	L78R, L127R(L127E in Jirka)	Inborn genetic diseases	VCV002290512	21	46595849	21	45175934	2290512	2283337		NC_000021.9:45175933:T:G	single nucleotide variant	missense variant|non-coding transcript variant	Uncertain significance	2022-05-25	criteria provided, single submitter
GRCh37/hg19 21q22.3(chr21:46427961-47085445)x4	ADARB1|COL18A1|LINC00315|LINC00334|POFUT2|SLC19A1		not provided	VCV003392203	21	46427961 - 47085445			3392203	3551283			copy number gain		Uncertain significance	2024-06-27	criteria provided, single submitter
GRCh37/hg19 21q22.3(chr21:44822667-48097372)x3	ADARB1|AGPAT3|AIRE|C21orf58|CFAP410|COL18A1|COL6A1|COL6A2|CSTB|DIP2A|DNMT3L|FTCD|GATD3|HSF2BP|ICOSLG|ITGB2|KRTAP10-1|KRTAP10-10|KRTAP10-11|KRTAP10-12|KRTAP10-2|KRTAP10-3|KRTAP10-4|KRTAP10-5|KRTAP10-6|KRTAP10-7|KRTAP10-8|KRTAP10-9|KRTAP12-1|KRTAP12-2|KRTAP12-3|KRTAP12-4|LINC00163|LINC00315|LINC00334|LRRC3|LSS|MCM3AP|PCBP3|PCNT|PDXK|PFKL|POFUT2|PRMT2|PTTG1IP|PWP2|RRP1|RRP1B|S100B|SIK1|SLC19A1|SLX9|…		not provided	VCV003392202	21	44822667 - 48097372			3392202	3551282			copy number gain		Uncertain significance	2024-06-07	criteria provided, single submitter
NM_001112.4(ADARB1):c.379A>G (p.Lys127Glu)	ADARB1	K127E, K176E	Neurodevelopmental disorder with hypotonia, microcephaly, and seizures	VCV000870451	21	46595995	21	45176080	870451	858619	rs2091682680	NC_000021.9:45176079:A:G	single nucleotide variant	missense variant|non-coding transcript variant	Pathogenic	2020-04-30	no assertion criteria provided
NM_001112.4(ADARB1):c.1827del (p.Ile609fs)	ADARB1	I609fs, I649fs, I658fs, I698fs	not provided	VCV003371900	21	46640829	21	45220914	3371900	3531090		NC_000021.9:45220913:TT:T	Deletion	frameshift variant|non-coding transcript variant	Uncertain significance	2024-03-29	criteria provided, single submitter
NM_001112.4(ADARB1):c.488C>G (p.Thr163Arg)	ADARB1	T163R, T212R	Inborn genetic diseases	VCV002388723	21	46596104	21	45176189	2388723	2376629		NC_000021.9:45176188:C:G	single nucleotide variant	missense variant|non-coding transcript variant	Uncertain significance	2021-04-07	criteria provided, single submitter
NM_001112.4(ADARB1):c.524C>T (p.Thr175Met)	ADARB1	T175M, T224M	Inborn genetic diseases	VCV002592165	21	46596140	21	45176225	2592165	2758391		NC_000021.9:45176224:C:T	single nucleotide variant	missense variant|non-coding transcript variant	Uncertain significance	2023-09-12	criteria provided, single submitter
NM_001112.4(ADARB1):c.610G>T (p.Gly204Trp)	ADARB1	G253W, G204W	Inborn genetic diseases	VCV003080274	21	46596226	21	45176311	3080274	3246531		NC_000021.9:45176310:G:T	single nucleotide variant	missense variant|non-coding transcript variant	Uncertain significance	2024-02-12	criteria provided, single submitter
NM_001112.4(ADARB1):c.713T>C (p.Met238Thr)	ADARB1	M238T, M287T	Neurodevelopmental disorder with hypotonia, microcephaly, and seizures	VCV002438867	21	46596329	21	45176414	2438867	2414549		NC_000021.9:45176413:T:C	single nucleotide variant	missense variant|non-coding transcript variant	Uncertain significance	2021-12-06	criteria provided, single submitter
NM_001112.4(ADARB1):c.724G>A (p.Glu242Lys)	ADARB1	E242K, E291K	Inborn genetic diseases	VCV003268741	21	46596340	21	45176425	3268741	3423110		NC_000021.9:45176424:G:A	single nucleotide variant	missense variant|non-coding transcript variant	Uncertain significance	2024-03-20	criteria provided, single submitter
NM_001112.4(ADARB1):c.731G>A (p.Arg244His)	ADARB1	R293H, R244H	Inborn genetic diseases	VCV003268752	21	46596347	21	45176432	3268752	3423121		NC_000021.9:45176431:G:A	single nucleotide variant	missense variant|non-coding transcript variant	Uncertain significance	2024-04-23	criteria provided, single submitter
NM_001112.4(ADARB1):c.730C>G (p.Arg244Gly)	ADARB1	R244G, R293G	not provided	VCV002505263	21	46596346	21	45176431	2505263	2670230		NC_000021.9:45176430:C:G	single nucleotide variant	missense variant|non-coding transcript variant	Uncertain significance	2023-02-02	criteria provided, single submitter
NM_001112.4(ADARB1):c.766G>A (p.Gly256Arg)	ADARB1	G305R, G256R	Inborn genetic diseases	VCV002496227	21	46596382	21	45176467	2496227	2470002		NC_000021.9:45176466:G:A	single nucleotide variant	missense variant|non-coding transcript variant	Uncertain significance	2023-03-14	criteria provided, single submitter
NM_001112.4(ADARB1):c.827G>T (p.Gly276Val)	ADARB1	G276V, G325V	Neurodevelopmental disorder with hypotonia, microcephaly, and seizures	VCV003341324	21	46596443	21	45176528	3341324	3500560		NC_000021.9:45176527:G:T	single nucleotide variant	missense variant|non-coding transcript variant	Uncertain significance	2023-05-20	criteria provided, single submitter
NC_000021.8:g.(?_44296792)_(47865240_?)del	ADARB1|AGPAT3|AIRE|C21orf58|CBS|CFAP410|COL18A1|COL6A1|COL6A2|CRYAA|CSTB|DNMT3L|FTCD|GATD3|HSF2BP|ICOSLG|ITGB2|KRTAP10-1|KRTAP10-10|KRTAP10-11|KRTAP10-12|KRTAP10-2|KRTAP10-3|KRTAP10-4|KRTAP10-5|KRTAP10-6|KRTAP10-7|KRTAP10-8|KRTAP10-9|KRTAP12-1|KRTAP12-2|KRTAP12-3|KRTAP12-4|LINC00163|LINC00315|LINC00334|LRRC3|LSS|MCM3AP|NDUFV3|PCBP3|PCNT|PDXK|PFKL|PKNOX1|POFUT2|PTTG1IP|PWP2|RRP1|RRP1B|SIK1|SLC19A1…		not provided	VCV003248207	21	44296792 - 47865240			3248207	3403143			Deletion		Pathogenic	2022-08-23	criteria provided, single submitter
NC_000021.8:g.(?_45647421)_(47865240_?)dup	ADARB1|AIRE|C21orf58|CFAP410|COL18A1|COL6A1|COL6A2|DNMT3L|FTCD|ICOSLG|ITGB2|KRTAP10-1|KRTAP10-10|KRTAP10-11|KRTAP10-12|KRTAP10-2|KRTAP10-3|KRTAP10-4|KRTAP10-5|KRTAP10-6|KRTAP10-7|KRTAP10-8|KRTAP10-9|KRTAP12-1|KRTAP12-2|KRTAP12-3|KRTAP12-4|LINC00163|LINC00315|LINC00334|LRRC3|LSS|MCM3AP|PCBP3|PCNT|PFKL|POFUT2|PTTG1IP|SLC19A1|SLX9|SPATC1L|SUMO3|TRPM2|TSPEAR|UBE2G2|YBEY		not provided	VCV003248201	21	45647421 - 47865240			3248201	3403138			Duplication		Uncertain significance	2024-01-23	criteria provided, single submitter
NM_001112.4(ADARB1):c.1656C>T (p.His552=)	ADARB1		not provided	VCV003239028	21	46624560	21	45204645	3239028	3398019		NC_000021.9:45204644:C:T	single nucleotide variant	synonymous variant|non-coding transcript variant	Likely benign	2024-05-01	criteria provided, single submitter
NM_001112.4(ADARB1):c.830C>T (p.Ser277Leu)	ADARB1	S277L, S326L	Inborn genetic diseases	VCV002549651	21	46596446	21	45176531	2549651	2725222		NC_000021.9:45176530:C:T	single nucleotide variant	missense variant|non-coding transcript variant	Uncertain significance	2023-05-23	criteria provided, single submitter
NM_001112.4(ADARB1):c.860G>A (p.Arg287Gln)	ADARB1	R287Q, R336Q	Inborn genetic diseases	VCV003493432	21	46596476	21	45176561	3493432	3660322		NC_000021.9:45176560:G:A	single nucleotide variant	missense variant|non-coding transcript variant	Uncertain significance	2024-11-24	criteria provided, single submitter
NM_001112.4(ADARB1):c.1079-4del	ADARB1		ADARB1-related disorder	VCV003060780	21	46602484	21	45182569	3060780	3197196		NC_000021.9:45182568:TTTTTTTTTTTTT:TTTTTTTTTTTT	Deletion	intron variant	Likely benign	2022-05-10	no assertion criteria provided
GRCh37/hg19 21q22.3(chr21:46429020-47080985)x3	ADARB1|COL18A1|LINC00315|LINC00334|POFUT2|SLC19A1		not provided	VCV002684922	21	46429020 - 47080985			2684922	2845957			copy number gain		Uncertain significance	2022-10-05	criteria provided, single submitter
NM_001112.4(ADARB1):c.1719C>G (p.Leu573=)	ADARB1		not provided	VCV002652788	21	46624623	21	45204708	2652788	2821852		NC_000021.9:45204707:C:G	single nucleotide variant	synonymous variant|non-coding transcript variant	Likely benign	2022-11-01	criteria provided, single submitter
NM_001112.4(ADARB1):c.1074A>G (p.Thr358=)	ADARB1		not provided	VCV002652787	21	46600355	21	45180440	2652787	2821851		NC_000021.9:45180439:A:G	single nucleotide variant	synonymous variant|non-coding transcript variant	Likely benign	2023-08-01	criteria provided, single submitter
NM_001112.4(ADARB1):c.843G>A (p.Lys281=)	ADARB1		not provided	VCV002652786	21	46596459	21	45176544	2652786	2821850		NC_000021.9:45176543:G:A	single nucleotide variant	synonymous variant|non-coding transcript variant	Likely benign	2024-09-01	criteria provided, single submitter
NM_001112.4(ADARB1):c.759C>T (p.Ser253=)	ADARB1		not provided	VCV002652785	21	46596375	21	45176460	2652785	2821849		NC_000021.9:45176459:C:T	single nucleotide variant	synonymous variant|non-coding transcript variant	Likely benign	2023-03-01	criteria provided, single submitter
NM_001112.4(ADARB1):c.723C>T (p.Asn241=)	ADARB1		not provided	VCV002652784	21	46596339	21	45176424	2652784	2821848		NC_000021.9:45176423:C:T	single nucleotide variant	synonymous variant|non-coding transcript variant	Likely benign	2022-07-01	criteria provided, single submitter
NM_001112.4(ADARB1):c.-48+6170C>G	ADARB1		not provided	VCV002652783	21	46554658	21	45134743	2652783	2821847		NC_000021.9:45134742:C:G	single nucleotide variant	non-coding transcript variant|intron variant	Likely benign	2022-11-01	criteria provided, single submitter
NM_001112.4(ADARB1):c.860G>T (p.Arg287Leu)	ADARB1	R287L, R336L	Inborn genetic diseases	VCV003493412	21	46596476	21	45176561	3493412	3660302		NC_000021.9:45176560:G:T	single nucleotide variant	missense variant|non-coding transcript variant	Uncertain significance	2024-10-19	criteria provided, single submitter
NM_001112.4(ADARB1):c.985C>T (p.Arg329Cys)	ADARB1	R329C, R378C	Inborn genetic diseases	VCV002278963	21	46600266	21	45180351	2278963	2272670		NC_000021.9:45180350:C:T	single nucleotide variant	missense variant|non-coding transcript variant	Uncertain significance	2022-03-16	criteria provided, single submitter
NM_001112.4(ADARB1):c.1034C>T (p.Pro345Leu)	ADARB1	P345L, P394L	not provided	VCV003380681	21	46600315	21	45180400	3380681	3539854		NC_000021.9:45180399:C:T	single nucleotide variant	missense variant|non-coding transcript variant	Uncertain significance	2024-04-09	criteria provided, single submitter
NM_001112.4(ADARB1):c.1101G>C (p.Lys367Asn)	ADARB1	K367N, K416N	Syndromic intellectual disability	VCV000870449	21	46602522	21	45182607	870449	858617	rs778818769	NC_000021.9:45182606:G:C	single nucleotide variant	non-coding transcript variant|missense variant	Uncertain significance	2020-05-29	criteria provided, single submitter
NM_001112.4(ADARB1):c.1102G>T (p.Val368Leu)	ADARB1	V368L, V12L, V417L	Inborn genetic diseases	VCV002606467	21	46602523	21	45182608	2606467	2768898		NC_000021.9:45182607:G:T	single nucleotide variant	missense variant|non-coding transcript variant	Uncertain significance	2023-06-26	criteria provided, single submitter
NM_001112.4(ADARB1):c.1178G>C (p.Cys393Ser)	ADARB1	C442S, C393S	Inborn genetic diseases	VCV003268758	21	46602599	21	45182684	3268758	3423127		NC_000021.9:45182683:G:C	single nucleotide variant	missense variant|non-coding transcript variant	Uncertain significance	2024-05-15	criteria provided, single submitter
NM_001112.4(ADARB1):c.1204T>G (p.Ser402Ala)	ADARB1	S451A, S402A	Inborn genetic diseases	VCV003268738	21	46602625	21	45182710	3268738	3423107		NC_000021.9:45182709:T:G	single nucleotide variant	missense variant|non-coding transcript variant	Uncertain significance	2024-06-10	criteria provided, single submitter
NM_001112.4(ADARB1):c.1253A>G (p.Lys418Arg)	ADARB1	K418R, K467R, K62R	Inborn genetic diseases	VCV002357646	21	46603282	21	45183367	2357646	2348258		NC_000021.9:45183366:A:G	single nucleotide variant	missense variant|non-coding transcript variant	Uncertain significance	2022-10-26	criteria provided, single submitter
NM_001112.4(ADARB1):c.1245_1247+1del	ADARB1		Neurodevelopmental disorder with hypotonia, microcephaly, and seizures	VCV002443915	21	46602666 - 46602669	21	45182751 - 45182754	2443915	2417652		NC_000021.9:45182750:AAAG:	Deletion	splice donor variant	Pathogenic	2023-03-10	no assertion criteria provided
NM_001112.4(ADARB1):c.1273A>G (p.Ile425Val)	ADARB1	I425V, I474V	Inborn genetic diseases	VCV003268745	21	46603302	21	45183387	3268745	3423114		NC_000021.9:45183386:A:G	single nucleotide variant	missense variant|non-coding transcript variant	Uncertain significance	2024-03-30	criteria provided, single submitter
NM_001112.4(ADARB1):c.1457C>T (p.Ser486Phe)	ADARB1	S526F, S575F, S130F, S486F, S535F	Inborn genetic diseases	VCV002480838	21	46604898	21	45184983	2480838	2454555		NC_000021.9:45184982:C:T	single nucleotide variant	missense variant|non-coding transcript variant	Uncertain significance	2023-02-06	criteria provided, single submitter
NM_001112.4(ADARB1):c.1481G>A (p.Arg494His)	ADARB1	R583H, R534H, R543H, R494H, R138H	Inborn genetic diseases	VCV002367798	21	46604922	21	45185007	2367798	2347399		NC_000021.9:45185006:G:A	single nucleotide variant	missense variant|non-coding transcript variant	Uncertain significance	2021-08-16	criteria provided, single submitter
NM_001112.4(ADARB1):c.1489G>A (p.Ala497Thr)	ADARB1	A586T, A497T, A537T, A546T	Inborn genetic diseases	VCV003493401	21	46604930	21	45185015	3493401	3660291		NC_000021.9:45185014:G:A	single nucleotide variant	missense variant|non-coding transcript variant	Uncertain significance	2024-09-11	criteria provided, single submitter
NM_001112.4(ADARB1):c.409_411del (p.Lys137del)	ADARB1	K137del, K186del	Neurodevelopmental disorder with hypotonia, microcephaly, and seizures	VCV002431514	21	46596023 - 46596025	21	45176108 - 45176110	2431514	2405018		NC_000021.9:45176107:AGAAG:AG	Deletion	inframe_deletion|inframe_indel|non-coding transcript variant	Uncertain significance	2022-12-14	criteria provided, single submitter
NM_001112.4(ADARB1):c.1397-354A>G	ADARB1	T498A, T547A	Syndromic intellectual disability|Neurodevelopmental disorder with hypotonia, microcephaly, and seizures	VCV000977164	21	46604484	21	45184569	977164	965292	rs544025652	NC_000021.9:45184568:A:G	single nucleotide variant	intron variant|missense variant|non-coding transcript variant	Uncertain significance	2021-08-11	criteria provided, multiple submitters, no conflicts
NM_001112.4(ADARB1):c.1492A>G (p.Ser498Gly)	ADARB1	S538G, S498G, S587G	Neurodevelopmental disorder with hypotonia, microcephaly, and seizures	VCV000870450	21	46604933	21	45185018	870450	858618	rs2092054613	NC_000021.9:45185017:A:G	single nucleotide variant	missense variant|non-coding transcript variant	Pathogenic	2020-04-30	no assertion criteria provided
NM_001112.4(ADARB1):c.1564C>T (p.Arg522Cys)	ADARB1	R562C, R166C, R522C, R611C, R571C	Inborn genetic diseases	VCV002300221	21	46605005	21	45185090	2300221	2289136		NC_000021.9:45185089:C:T	single nucleotide variant	missense variant|non-coding transcript variant	Uncertain significance	2022-07-08	criteria provided, single submitter
NM_001112.4(ADARB1):c.1573G>A (p.Val525Met)	ADARB1	V169M, V525M, V565M, V574M, V614M	Neurodevelopmental disorder with hypotonia, microcephaly, and seizures	VCV002431949	21	46624477	21	45204562	2431949	2405453		NC_000021.9:45204561:G:A	single nucleotide variant	missense variant|non-coding transcript variant	Uncertain significance	2022-12-14	criteria provided, single submitter
NM_001112.4(ADARB1):c.1582A>G (p.Ile528Val)	ADARB1	I568V, I528V, I617V	not provided|not specified	VCV000218725	21	46624486	21	45204571	218725	215593	rs146201109	NC_000021.9:45204570:A:G	single nucleotide variant	missense variant|non-coding transcript variant	Conflicting classifications of pathogenicity	2023-05-01	criteria provided, conflicting classifications
NM_001112.4(ADARB1):c.1628C>T (p.Ser543Leu)	ADARB1	S543L, S583L, S592L, S632L	not provided	VCV003370262	21	46624532	21	45204617	3370262	3529453		NC_000021.9:45204616:C:T	single nucleotide variant	missense variant|non-coding transcript variant	Uncertain significance	2023-12-29	criteria provided, single submitter
NM_001112.4(ADARB1):c.1657G>A (p.Gly553Arg)	ADARB1	G553R, G602R, G197R, G642R, G593R	Inborn genetic diseases	VCV002305741	21	46624561	21	45204646	2305741	2293794		NC_000021.9:45204645:G:A	single nucleotide variant	missense variant|non-coding transcript variant	Uncertain significance	2022-08-08	criteria provided, single submitter
NM_001112.4(ADARB1):c.1688G>A (p.Arg563Gln)	ADARB1	R603Q, R563Q, R652Q	Neurodevelopmental disorder with hypotonia, microcephaly, and seizures	VCV000870452	21	46624592	21	45204677	870452	858620	rs1364071684	NC_000021.9:45204676:G:A	single nucleotide variant	missense variant|non-coding transcript variant	Pathogenic	2020-04-30	no assertion criteria provided
NM_001112.4(ADARB1):c.1769G>A (p.Arg590Gln)	ADARB1	R630Q, R234Q, R590Q, R639Q, R679Q	Neurodevelopmental disorder with hypotonia, microcephaly, and seizures	VCV002443914	21	46640772	21	45220857	2443914	2417651		NC_000021.9:45220856:G:A	single nucleotide variant	missense variant|non-coding transcript variant	Pathogenic	2023-03-10	no assertion criteria provided
NM_001112.4(ADARB1):c.1822G>A (p.Ala608Thr)	ADARB1	A252T, A648T, A697T, A608T, A657T	Inborn genetic diseases	VCV002323716	21	46640825	21	45220910	2323716	2312181		NC_000021.9:45220909:G:A	single nucleotide variant	missense variant|non-coding transcript variant	Uncertain significance	2022-11-08	criteria provided, single submitter
NM_001112.4(ADARB1):c.1079-5_1079-4dup	ADARB1		Inborn genetic diseases	VCV002220990	21	46602483 - 46602484	21	45182568 - 45182569	2220990	2210895		NC_000021.9:45182568:TTTTTTTTTTTTT:TTTTTTTTTTTTTTT	Duplication	intron variant	Uncertain significance	2021-12-15	criteria provided, single submitter
NM_001112.4(ADARB1):c.1825A>G (p.Ile609Val)	ADARB1	I609V, I658V, I253V, I649V, I698V	Inborn genetic diseases	VCV002210520	21	46640828	21	45220913	2210520	2197855		NC_000021.9:45220912:A:G	single nucleotide variant	missense variant|non-coding transcript variant	Uncertain significance	2022-12-01	criteria provided, single submitter
GRCh37/hg19 21q22.3(chr21:46247514-46657568)x4	ADARB1|ITGB2|LINC00163|PTTG1IP|SLX9		not provided	VCV001808234	21	46247514 - 46657568			1808234	1865238			copy number gain		Uncertain significance	2022-05-31	criteria provided, single submitter
NM_001112.4(ADARB1):c.1847C>A (p.Thr616Asn)	ADARB1	T616N, T656N, T665N, T705N	not provided	VCV003340382	21	46640850	21	45220935	3340382	3499638		NC_000021.9:45220934:C:A	single nucleotide variant	missense variant|non-coding transcript variant	Uncertain significance	2023-12-29	criteria provided, single submitter
NM_001112.4(ADARB1):c.456C>T (p.His152=)	ADARB1		not provided	VCV001675873	21	46596072	21	45176157	1675873	1667256	rs2091685500	NC_000021.9:45176156:C:T	single nucleotide variant	synonymous variant|non-coding transcript variant	Likely benign	2022-02-01	criteria provided, single submitter
GRCh37/hg19 21q22.3(chr21:45773272-48097372)	ADARB1|C21orf58|COL18A1|COL6A1|COL6A2|DIP2A|FTCD|ITGB2|KRTAP10-1|KRTAP10-10|KRTAP10-11|KRTAP10-12|KRTAP10-2|KRTAP10-3|KRTAP10-4|KRTAP10-5|KRTAP10-6|KRTAP10-7|KRTAP10-8|KRTAP10-9|KRTAP12-1|KRTAP12-2|KRTAP12-3|KRTAP12-4|LINC00163|LINC00315|LINC00334|LRRC3|LSS|MCM3AP|PCBP3|PCNT|POFUT2|PRMT2|PTTG1IP|S100B|SLC19A1|SLX9|SPATC1L|SUMO3|TRPM2|TSPEAR|UBE2G2|YBEY		not specified	VCV001526725	21	45773272 - 48097372			1526725	1518214			copy number loss		Pathogenic	2022-03-01	criteria provided, single submitter
GRCh37/hg19 21q22.3(chr21:45265857-47057233)	ADARB1|AGPAT3|AIRE|CFAP410|COL18A1|DNMT3L|GATD3|ICOSLG|ITGB2|KRTAP10-1|KRTAP10-10|KRTAP10-11|KRTAP10-12|KRTAP10-2|KRTAP10-3|KRTAP10-4|KRTAP10-5|KRTAP10-6|KRTAP10-7|KRTAP10-8|KRTAP10-9|KRTAP12-1|KRTAP12-2|KRTAP12-3|KRTAP12-4|LINC00163|LINC00315|LINC00334|LRRC3|PFKL|POFUT2|PTTG1IP|PWP2|SLC19A1|SLX9|SUMO3|TRAPPC10|TRPM2|TSPEAR|UBE2G2		not specified	VCV001526724	21	45265857 - 47057233			1526724	1518213			copy number loss		Pathogenic	2022-03-01	criteria provided, single submitter
NC_000021.8:g.(?_44473990)_(47865240_?)dup	ADARB1|AGPAT3|AIRE|C21orf58|CBS|CFAP410|COL18A1|COL6A1|COL6A2|CRYAA|CSTB|DNMT3L|FTCD|GATD3|HSF2BP|ICOSLG|ITGB2|KRTAP10-1|KRTAP10-10|KRTAP10-11|KRTAP10-12|KRTAP10-2|KRTAP10-3|KRTAP10-4|KRTAP10-5|KRTAP10-6|KRTAP10-7|KRTAP10-8|KRTAP10-9|KRTAP12-1|KRTAP12-2|KRTAP12-3|KRTAP12-4|LINC00163|LINC00315|LINC00334|LRRC3|LSS|MCM3AP|PCBP3|PCNT|PDXK|PFKL|POFUT2|PTTG1IP|PWP2|RRP1|RRP1B|SIK1|SLC19A1|SLX9|SPATC1L|…		not provided	VCV001447702	21	44473990 - 47865240			1447702	1403589			Duplication		Uncertain significance	2021-12-13	criteria provided, single submitter
NC_000021.8:g.(?_46306283)_(47865240_?)del	ADARB1|C21orf58|COL18A1|COL6A1|COL6A2|FTCD|ITGB2|LINC00163|LINC00315|LINC00334|LSS|MCM3AP|PCBP3|PCNT|POFUT2|SLC19A1|SLX9|SPATC1L|YBEY		not provided	VCV001412950	21	46306283 - 47865240			1412950	1356547			Deletion		Uncertain significance	2021-10-22	criteria provided, single submitter
NC_000021.8:g.(?_43160998)_(47865240_?)dup	ADARB1|AGPAT3|COL6A1|COL6A2|CRYAA|CSTB|DNMT3L|FTCD|GATD3|HSF2BP|ICOSLG|ITGB2|COL18A1|KRTAP10-1|AIRE|C21orf58|C2CD2|CBS|CFAP410|ABCG1|KRTAP10-10|KRTAP10-11|KRTAP10-12|KRTAP10-2|KRTAP10-3|KRTAP10-4|KRTAP10-5|KRTAP10-6|KRTAP10-7|KRTAP10-8|KRTAP10-9|KRTAP12-1|KRTAP12-2|KRTAP12-3|KRTAP12-4|LINC00163|LINC00315|LINC00334|LRRC3|LSS|MCM3AP|NDUFV3|PCBP3|PCNT|PDE9A|PDXK|PFKL|PKNOX1|POFUT2|PRDM15|PTTG1IP|PWP…		Developmental and epileptic encephalopathy, 30|Primary ciliary dyskinesia|Cataract 9 multiple types	VCV001409580	21	43160998 - 47865240			1409580	1340649			Duplication		Uncertain significance	2022-10-27	criteria provided, single submitter
NM_001112.4(ADARB1):c.1868G>A (p.Arg623His)	ADARB1	R663H, R712H, R267H, R623H, R672H	Inborn genetic diseases	VCV002605150	21	46640871	21	45220956	2605150	2778818		NC_000021.9:45220955:G:A	single nucleotide variant	missense variant|non-coding transcript variant	Uncertain significance	2023-06-22	criteria provided, single submitter
NM_001112.4(ADARB1):c.1299dup (p.Phe434fs)	ADARB1	F434fs, F483fs	Neurodevelopmental disorder with hypotonia, microcephaly, and seizures	VCV000983120	21	46603322 - 46603323	21	45183407 - 45183408	983120	971156	rs1192446289	NC_000021.9:45183407:GGGGGG:GGGGGGG	Duplication	frameshift variant|non-coding transcript variant	Uncertain significance	2023-09-12	criteria provided, single submitter
NM_001112.4(ADARB1):c.1898A>G (p.Tyr633Cys)	ADARB1	Y633C, Y673C, Y682C	Inborn genetic diseases	VCV003493389	21	46640901	21	45220986	3493389	3660279		NC_000021.9:45220985:A:G	single nucleotide variant	missense variant|non-coding transcript variant|intron variant	Uncertain significance	2024-07-27	criteria provided, single submitter
NM_001112.4(ADARB1):c.1969G>A (p.Val657Met)	ADARB1	R731H, V697M, V706M, V301M, V657M	Inborn genetic diseases	VCV002290134	21	46641975	21	45222060	2290134	2285984		NC_000021.9:45222059:G:A	single nucleotide variant	missense variant|non-coding transcript variant	Likely benign	2022-05-18	criteria provided, single submitter
NM_001112.4(ADARB1):c.1987C>G (p.Leu663Val)	ADARB1	L307V, L663V, L703V, L712V	Inborn genetic diseases	VCV003080260	21	46641993	21	45222078	3080260	3246517		NC_000021.9:45222077:C:G	single nucleotide variant	missense variant|3 prime UTR variant|non-coding transcript variant	Uncertain significance	2023-12-14	criteria provided, single submitter
NM_001112.4(ADARB1):c.1993G>T (p.Ala665Ser)	ADARB1	A665S, A705S	Encephalopathy|Microcephaly|Abnormal CNS myelination	VCV000977316	21	46641999	21	45222084	977316	965446	rs1344272743	NC_000021.9:45222083:G:T	single nucleotide variant	missense variant|3 prime UTR variant|non-coding transcript variant	Benign		criteria provided, single submitter
NM_001112.4(ADARB1):c.2021G>A (p.Arg674His)	ADARB1	R714H, R318H, R674H, R723H	Inborn genetic diseases	VCV002365870	21	46642027	21	45222112	2365870	2350311		NC_000021.9:45222111:G:A	single nucleotide variant	missense variant|non-coding transcript variant|intron variant	Uncertain significance	2022-04-13	criteria provided, single submitter
NM_001112.4(ADARB1):c.2045C>T (p.Ala682Val)	ADARB1	A722V, A682V	Neurodevelopmental disorder with hypotonia, microcephaly, and seizures	VCV000870453	21	46642051	21	45222136	870453	858621	rs1323703791	NC_000021.9:45222135:C:T	single nucleotide variant	missense variant|non-coding transcript variant|intron variant	Pathogenic	2020-04-30	no assertion criteria provided
NM_001112.4(ADARB1):c.2077G>A (p.Glu693Lys)	ADARB1	E693K, E733K, E742K	Inborn genetic diseases	VCV003493423	21	46642083	21	45222168	3493423	3660313		NC_000021.9:45222167:G:A	single nucleotide variant	missense variant|non-coding transcript variant|intron variant	Uncertain significance	2024-11-14	criteria provided, single submitter
GRCh37/hg19 21q22.3(chr21:45490774-48097372)x1	ADARB1|AIRE|C21orf58|CFAP410|COL18A1|COL6A1|COL6A2|DIP2A|DNMT3L|FTCD|GATD3|ICOSLG|ITGB2|KRTAP10-1|KRTAP10-10|KRTAP10-11|KRTAP10-12|KRTAP10-2|KRTAP10-3|KRTAP10-4|KRTAP10-5|KRTAP10-6|KRTAP10-7|KRTAP10-8|KRTAP10-9|KRTAP12-1|KRTAP12-2|KRTAP12-3|KRTAP12-4|LINC00163|LINC00315|LINC00334|LRRC3|LSS|MCM3AP|PCBP3|PCNT|PFKL|POFUT2|PRMT2|PTTG1IP|PWP2|S100B|SLC19A1|SLX9|SPATC1L|SUMO3|TRAPPC10|TRPM2|TSPEAR|UBE2…		not provided	VCV000816179	21	45490774 - 48097372			816179	804387			copy number loss		Likely pathogenic	2019-05-14	no assertion criteria provided
GRCh37/hg19 21q22.3(chr21:45125672-48097372)x1	ADARB1|AGPAT3|AIRE|C21orf58|CFAP410|COL18A1|COL6A1|COL6A2|CSTB|DIP2A|DNMT3L|FTCD|GATD3|ICOSLG|ITGB2|KRTAP10-1|KRTAP10-10|KRTAP10-11|KRTAP10-12|KRTAP10-2|KRTAP10-3|KRTAP10-4|KRTAP10-5|KRTAP10-6|KRTAP10-7|KRTAP10-8|KRTAP10-9|KRTAP12-1|KRTAP12-2|KRTAP12-3|KRTAP12-4|LINC00163|LINC00315|LINC00334|LRRC3|LSS|MCM3AP|PCBP3|PCNT|PDXK|PFKL|POFUT2|PRMT2|PTTG1IP|PWP2|RRP1|S100B|SLC19A1|SLX9|SPATC1L|SUMO3|TRAP…		not provided	VCV000816178	21	45125672 - 48097372			816178	804386			copy number loss		Uncertain significance	2019-04-12	no assertion criteria provided
NM_001112.4(ADARB1):c.309C>T (p.Pro103=)	ADARB1		not provided	VCV000786691	21	46595925	21	45176010	786691	717259	rs115658841	NC_000021.9:45176009:C:T	single nucleotide variant	synonymous variant|non-coding transcript variant	Benign	2018-03-29	criteria provided, multiple submitters, no conflicts
NM_001112.4(ADARB1):c.2091C>T (p.Phe697=)	ADARB1		not provided	VCV000783883	21	46642097	21	45222182	783883	717260	rs9983291	NC_000021.9:45222181:C:T	single nucleotide variant	synonymous variant|non-coding transcript variant|intron variant	Benign	2019-12-31	criteria provided, multiple submitters, no conflicts
NM_001112.4(ADARB1):c.486C>T (p.Asn162=)	ADARB1		not provided	VCV000707858	21	46596102	21	45176187	707858	728964	rs148155796	NC_000021.9:45176186:C:T	single nucleotide variant	synonymous variant|non-coding transcript variant	Likely benign	2024-10-01	criteria provided, multiple submitters, no conflicts
GRCh37/hg19 21q22.3(chr21:44310057-47503155)x1	ADARB1|AGPAT3|AIRE|CBS|CFAP410|COL18A1|COL6A1|CRYAA|CSTB|DNMT3L|GATD3|HSF2BP|ICOSLG|ITGB2|KRTAP10-1|KRTAP10-10|KRTAP10-11|KRTAP10-12|KRTAP10-2|KRTAP10-3|KRTAP10-4|KRTAP10-5|KRTAP10-6|KRTAP10-7|KRTAP10-8|KRTAP10-9|KRTAP12-1|KRTAP12-2|KRTAP12-3|KRTAP12-4|LINC00163|LINC00315|LINC00334|LRRC3|NDUFV3|PCBP3|PDXK|PFKL|PKNOX1|POFUT2|PTTG1IP|PWP2|RRP1|RRP1B|SIK1|SLC19A1|SLX9|SUMO3|TRAPPC10|TRPM2|TSPEAR|U2A…		not provided	VCV000686963	21	44310057 - 47503155			686963	674555			copy number loss		Pathogenic	2018-07-26	no assertion criteria provided
GRCh37/hg19 21q22.3(chr21:46569203-46846998)x3	ADARB1|COL18A1|LINC00315|LINC00334|POFUT2		not provided	VCV000686593	21	46569203 - 46846998			686593	674185			copy number gain		Uncertain significance	2018-02-02	no assertion criteria provided
GRCh37/hg19 21q22.3(chr21:46523622-46556437)x1	ADARB1		not provided	VCV000685874	21	46523622 - 46556437			685874	673466			copy number loss		Uncertain significance	2018-02-28	no assertion criteria provided
GRCh37/hg19 21q22.3(chr21:46569203-46740333)x4	ADARB1|LINC00315|LINC00334|POFUT2		not provided	VCV000685466	21	46569203 - 46740333			685466	673058			copy number gain		Uncertain significance	2018-02-23	no assertion criteria provided
Single allele	ADARB1|AGPAT3|AIRE|CFAP410|COL18A1|CSTB|DNMT3L|GATD3|HSF2BP|ICOSLG|ITGB2|KRTAP10-1|KRTAP10-10|KRTAP10-11|KRTAP10-12|KRTAP10-2|KRTAP10-3|KRTAP10-4|KRTAP10-5|KRTAP10-6|KRTAP10-7|KRTAP10-8|KRTAP10-9|KRTAP12-1|KRTAP12-2|KRTAP12-3|KRTAP12-4|LINC00163|LINC00315|LINC00334|LRRC3|PDXK|PFKL|POFUT2|PTTG1IP|PWP2|RRP1|RRP1B|SIK1|SLX9|SUMO3|TRAPPC10|TRPM2|TSPEAR|UBE2G2		Neurodevelopmental disorder	VCV000635900	21	44627837 - 46920235			635900	623713			Deletion		Uncertain significance	2019-04-09	criteria provided, single submitter
Single allele	ADARB1|C21orf58|COL18A1|COL6A1|COL6A2|DIP2A|FTCD|LINC00163|LINC00315|LINC00334|LSS|MCM3AP|PCBP3|PCNT|POFUT2|PRMT2|S100B|SLC19A1|SLX9|SPATC1L|YBEY		Axenfeld-Rieger syndrome type 3	VCV000560066	21	46363553 - 48080926			560066	550782			Deletion		Pathogenic	2018-04-16	criteria provided, single submitter
GRCh37/hg19 21q22.3(chr21:46585679-46839643)x3	ADARB1|COL18A1|LINC00315|LINC00334|POFUT2		See cases	VCV000395383	21	46585679 - 46839643			395383	382276			copy number gain		Likely benign		no assertion criteria provided
GRCh37/hg19 21q22.3(chr21:46305956-46624646)x3	ADARB1|ITGB2|LINC00163|SLX9		See cases	VCV000393944	21	46305956 - 46624646			393944	380837			copy number gain		Uncertain significance		no assertion criteria provided
GRCh37/hg19 21q22.3(chr21:46363553-48080926)x1	ADARB1|C21orf58|COL18A1|COL6A1|COL6A2|DIP2A|FTCD|LINC00163|LINC00315|LINC00334|LSS|MCM3AP|PCBP3|PCNT|POFUT2|PRMT2|S100B|SLC19A1|SLX9|SPATC1L|YBEY		See cases	VCV000253527	21	46363553 - 48080926			253527	247975			copy number loss		Pathogenic	2016-01-20	criteria provided, single submitter
chr21:45970718..47545826 complex variant	ADARB1|COL18A1|COL6A1|COL6A2|ITGB2|KRTAP10-10|KRTAP10-11|KRTAP10-12|KRTAP10-2|KRTAP10-3|KRTAP10-4|KRTAP10-5|KRTAP10-6|KRTAP10-7|KRTAP10-8|KRTAP10-9|KRTAP12-1|KRTAP12-2|KRTAP12-3|KRTAP12-4|LINC00163|LINC00315|LINC00334|PCBP3|POFUT2|PTTG1IP|SLC19A1|SLX9|SUMO3|TSPEAR|UBE2G2		Breast ductal adenocarcinoma	VCV000221356	21	45970718 - 47545826			221356	223085			Complex		Uncertain significance	2015-07-20	no assertion criteria provided
NM_001112.4(ADARB1):c.1962G>A (p.Lys654=)	ADARB1	A729T	not provided|Neurodevelopmental disorder with hypotonia, microcephaly, and seizures	VCV001188900	21	46641968	21	45222053	1188900	1179014	rs1051367	NC_000021.9:45222052:G:A	single nucleotide variant	synonymous variant|missense variant|non-coding transcript variant	Benign	2021-07-14	criteria provided, multiple submitters, no conflicts
GRCh38/hg38 21q22.3(chr21:44516679-45409275)x1	ADARB1|BNAT1|COL18A1|COL18A1-AS2|ITGB2|ITGB2-AS1|KRTAP10-1|KRTAP10-10|KRTAP10-11|KRTAP10-12|KRTAP10-2|KRTAP10-3|KRTAP10-4|KRTAP10-5|KRTAP10-6|KRTAP10-7|KRTAP10-8|KRTAP10-9|KRTAP12-1|KRTAP12-2|KRTAP12-3|KRTAP12-4|LINC00163|LINC00165|LINC00205|LINC00315|LINC00316|LINC00334|LINC01424|LINC01547|LOC108281151|LOC112694751|LOC112694752|LOC116309125|LOC121627925|LOC121627926|LOC125418083|LOC125418084|LOC…		See cases	VCV000154064	21	45936562 - 46829190	21	44516679 - 45409275	154064	163815			copy number loss		Uncertain significance	2013-12-03	no assertion criteria provided
GRCh38/hg38 21q22.3(chr21:45165766-45411930)x3	ADARB1|BNAT1|COL18A1|COL18A1-AS2|LINC00205|LINC00315|LINC00316|LINC00334|LOC112694752|LOC116309125|LOC126653401|LOC126653402|LOC130066850|POFUT2		See cases	VCV000150671	21	46585681 - 46831845	21	45165766 - 45411930	150671	160422			copy number gain		Likely benign	2012-09-21	no assertion criteria provided
GRCh38/hg38 21q22.3(chr21:45138321-46670405)x1	ADARB1|BNAT1|C21orf58|COL18A1|COL18A1-AS1|COL18A1-AS2|COL6A1|COL6A2|COL6A2-DT|DIP2A|DIP2A-IT1|FTCD|FTCD-AS1|LINC00205|LINC00315|LINC00316|LINC00334|LINC01694|LOC101928796|LOC112694752|LOC112694753|LOC112694754|LOC116309125|LOC121627926|LOC121627927|LOC121853033|LOC121853034|LOC125418086|LOC125418087|LOC125418088|LOC126653401|LOC126653402|LOC126653403|LOC126653404|LOC128092249|LOC129391251|LOC1293…		See cases	VCV000059068	21	46558236 - 48090317	21	45138321 - 46670405	59068	73663			copy number loss		Pathogenic	2011-08-12	criteria provided, multiple submitters, no conflicts
GRCh38/hg38 21q22.3(chr21:45110477-46648012)x1	ADARB1|BNAT1|C21orf58|COL18A1|COL18A1-AS1|COL18A1-AS2|COL6A1|COL6A2|COL6A2-DT|DIP2A|DIP2A-IT1|FTCD|FTCD-AS1|LINC00205|LINC00315|LINC00316|LINC00334|LINC01694|LOC101928796|LOC112694752|LOC112694753|LOC112694754|LOC116309125|LOC121627926|LOC121627927|LOC121853033|LOC121853034|LOC125418086|LOC125418087|LOC125418088|LOC126653401|LOC126653402|LOC126653403|LOC126653404|LOC128092249|LOC129391251|LOC1293…		See cases	VCV000059046	21	46530392 - 48067924	21	45110477 - 46648012	59046	73641			copy number loss		Pathogenic	2011-08-12	criteria provided, single submitter
GRCh38/hg38 21q22.3(chr21:45084236-45991858)x3	ADARB1|BNAT1|COL18A1|COL18A1-AS1|COL18A1-AS2|COL6A1|LINC00205|LINC00315|LINC00316|LINC00334|LINC01694|LOC101928796|LOC112694752|LOC116309125|LOC121627926|LOC121627927|LOC125418086|LOC125418087|LOC126653401|LOC126653402|LOC126653403|LOC126653404|LOC129391251|LOC129391252|LOC129391253|LOC130066848|LOC130066849|LOC130066850|LOC130066851|LOC130066852|LOC130066853|LOC130066854|LOC130066855|LOC13006685…		See cases	VCV000059035	21	46504151 - 47411772	21	45084236 - 45991858	59035	73630			copy number gain		Uncertain significance	2011-08-12	criteria provided, single submitter
GRCh37/hg19 21q11.2-22.3(chr21:15006457-48097372)x3	ATP5PF|IL10RB|MIR155|MIR99A|MIRLET7C|MIS18A|N6AMT1|NCAM2|NDUFV3|MORC3|KRTAP10-9|KRTAP11-1|KRTAP12-1|KRTAP10-11|KRTAP10-12|KRTAP10-2|KRTAP10-3|KRTAP10-4|KRTAP10-7|KRTAP10-8|KRTAP10-1|KRTAP10-10|MRPS6|MX1|NRIP1|OLIG1|OLIG2|MRAP|MRPL39|ATP5PO|B3GALT5|BACE2|BACH1|C21orf58|C21orf91|C2CD2|CBR1|CBR3|CBS|CCT8|BRWD1|BTG3|MX2|ITGB2|KRTAP10-5|KRTAP10-6|ABCG1|ADAMTS1|ADAMTS5|ADARB1|AGPAT3|AIRE|APP|CFAP298|CF…		not provided	VCV000686229	21	15006457 - 48097372			686229	673821			copy number gain		Pathogenic	2018-06-18	no assertion criteria provided
GRCh38/hg38 21q22.3(chr21:41285201-46670405)x1	BNAT1|C21orf58|C2CD2|CBS|CFAP410|COL18A1|COL18A1-AS1|COL18A1-AS2|COL6A1|COL6A2|COL6A2-DT|CRYAA|CSTB|DIP2A|DIP2A-IT1|DNMT3L|DNMT3L-AS1|ERVH48-1|FAM3B|FRGCA|FTCD|FTCD-AS1|GATD3|H2BC12L|HSF2BP|ICOSLG|ITGB2|ITGB2-AS1|KRTAP10-1|KRTAP10-10|KRTAP10-11|KRTAP10-12|KRTAP10-2|KRTAP10-3|KRTAP10-4|KRTAP10-5|KRTAP10-6|KRTAP10-7|KRTAP10-8|KRTAP10-9|KRTAP12-1|KRTAP12-2|KRTAP12-3|KRTAP12-4|LINC00111|LINC00112|LIN…		See cases	VCV000057337	21	42657128 - 48090317	21	41285201 - 46670405	57337	71932			copy number loss		Pathogenic	2011-08-12	criteria provided, single submitter
GRCh37/hg19 21q22.11-22.3(chr21:34092685-48097372)x3	CBR1|CBR3|CBS|KRTAP10-3|KRTAP10-4|KRTAP10-5|RRP1|RRP1B|RSPH1|SLC19A1|SLC37A1|UMODL1|TMEM50B|TMPRSS2|TMPRSS3|UBE2G2|SLC5A3|SLX9|SMIM11|TFF3|KRTAP10-6|KRTAP10-7|KRTAP10-8|KRTAP10-9|KRTAP12-1|KRTAP12-2|LINC00114|LINC00163|LINC00315|KRTAP12-3|KRTAP12-4|LCA5L|LINC00334|ERG|ETS2|MCM3AP|MORC3|MRPS6|LRRC3|LSS|CFAP410|FAM3B|CHAF1B|CLDN14|CLIC6|COL18A1|COL6A1|COL6A2|CRYZL1|CSTB|CRYAA|ABCG1|ADARB1|AGPAT3|AI…		not specified	VCV003062429	21	34092685 - 48097372			3062429	3222653			copy number gain		Pathogenic		criteria provided, single submitter
GRCh37/hg19 21q22.3(chr21:43603041-48097372)x1	COL18A1|S100B|SIK1|SLC19A1|SLC37A1|TFF2|TFF3|TMPRSS3|WDR4|SLX9|SPATC1L|YBEY|KRTAP10-10|KRTAP10-11|SUMO3|TFF1|COL6A1|COL6A2|KRTAP10-12|KRTAP10-2|KRTAP10-5|KRTAP10-6|KRTAP10-7|KRTAP10-8|CRYAA|CSTB|ITGB2|KRTAP10-1|KRTAP10-3|KRTAP10-4|ABCG1|ADARB1|AGPAT3|AIRE|C21orf58|CBS|CFAP410|DIP2A|DNMT3L|FTCD|GATD3|HSF2BP|ICOSLG|KRTAP10-9|KRTAP12-1|KRTAP12-2|KRTAP12-3|KRTAP12-4|LINC00163|LINC00315|LINC00334|LRRC…		not specified	VCV003062421	21	43603041 - 48097372			3062421	3222645			copy number loss		Pathogenic		criteria provided, single submitter
GRCh37/hg19 21p13-q22.3(chr21:1-48129895)x3	COL6A2|KRTAP20-3|S100B|SLC5A3|SAMSN1|SLX9|SCAF4|SETD4|KRTAP22-1|KRTAP22-2|KRTAP23-1|KRTAP24-1|KRTAP25-1|KRTAP26-1|SH3BGR|SIK1|SIM2|SLC19A1|SLC37A1|CXADR|GABPA|ERG|ETS2|FAM3B|FTCD|CYYR1|EVA1C|KRTAP20-4|KRTAP21-2|KRTAP21-1|KRTAP21-3|CRYAA|CRYZL1|CSTB|ADAMTS5|ADARB1|AGPAT3|AIRE|ABCG1|ADAMTS1|APP|ATP5PF|ATP5PO|B3GALT5|BACE2|BACH1|BAGE2|BAGE3|BRWD1|BTG3|C21orf58|C21orf91|C2CD2|CBR1|CBR3|CBS|CCT8|CFAP2…		See cases	VCV001321998	21	1 - 48129895			1321998	1312316			copy number gain		Pathogenic	2021-07-29	criteria provided, single submitter
GRCh37/hg19 21q22.3(chr21:45102309-48097372)x1	DNMT3L|SLX9|SPATC1L|SUMO3|KRTAP10-12|KRTAP10-2|KRTAP10-3|KRTAP10-4|KRTAP10-5|KRTAP10-6|KRTAP10-1|KRTAP10-7|FTCD|GATD3|ICOSLG|ITGB2|KRTAP10-10|KRTAP10-11|ADARB1|AGPAT3|AIRE|C21orf58|CFAP410|COL18A1|COL6A1|COL6A2|CSTB|DIP2A|KRTAP10-8|KRTAP10-9|KRTAP12-1|KRTAP12-2|KRTAP12-3|KRTAP12-4|LINC00163|LINC00315|LINC00334|LRRC3|LSS|MCM3AP|PCBP3|PCNT|PDXK|PFKL|POFUT2|PRMT2|PTTG1IP|PWP2|RRP1|RRP1B|S100B|SLC19A…		not specified	VCV003062427	21	45102309 - 48097372			3062427	3222651			copy number loss		Pathogenic		criteria provided, single submitter
GRCh37/hg19 21q22.3(chr21:43369956-48097372)x1	DNMT3L|PRMT2|S100B|SIK1|SLC19A1|SLC37A1|SLX9|SPATC1L|SUMO3|PWP2|RRP1|KRTAP10-1|KRTAP10-2|GATD3|ITGB2|KRTAP10-10|KRTAP10-11|KRTAP10-12|HSF2BP|ICOSLG|PTTG1IP|RRP1B|RSPH1|FTCD|ABCG1|ADARB1|AGPAT3|AIRE|C21orf58|C2CD2|CBS|CFAP410|COL18A1|COL6A1|COL6A2|CRYAA|CSTB|DIP2A|KRTAP10-3|KRTAP10-4|KRTAP10-5|KRTAP10-6|KRTAP10-7|KRTAP10-8|KRTAP10-9|KRTAP12-1|KRTAP12-2|KRTAP12-3|KRTAP12-4|LINC00163|LINC00315|LINC0…		not specified	VCV003062426	21	43369956 - 48097372			3062426	3222650			copy number loss		Pathogenic		criteria provided, single submitter
GRCh38/hg38 21q11.2-22.3(chr21:7749532-46649831)x3	ETS2-AS1|EVA1C|FAM3B|FRGCA|FTCD|FTCD-AS1|GABPA|GART|GATD3|GET1|GET1-SH3BGR|GRIK1|GRIK1-AS1|GRIK1-AS2|H2BC12L|HLCS|HLCS-AS1|HMGN1|HSF2BP|HSPA13|HUNK|ICOSLG|IFNAR1|IFNAR2|IFNAR2-IL10RB|IFNGR2|IGSF5|IL10RB|IL10RB-DT|ITGB2|ITGB2-AS1|ITSN1|JAM2|KCNE1|KCNE2|KCNJ15|KCNJ6|KCNJ6-AS1|KRTAP10-1|KRTAP10-10|KRTAP10-11|KRTAP10-12|KRTAP10-2|KRTAP10-3|KRTAP10-4|KRTAP10-5|KRTAP10-6|KRTAP10-7|KRTAP10-8|KRTAP10-9|K…		See cases	VCV000145107	21	14577835 - 48069743	21	7749532 - 46649831	145107	154858			copy number gain		Pathogenic	2010-11-30	no assertion criteria provided
GRCh37/hg19 21q11.2-22.3(chr21:14771770-48080867)x3	EVA1C|FAM3B|KRTAP12-1|MIR155|MIR99A|RWDD2B|S100B|KRTAP12-2|KRTAP12-3|MIRLET7C|SAMSN1|SCAF4|FTCD|GABPA|KRTAP12-4|KRTAP13-1|MIS18A|SETD4|SH3BGR|SLX9|SMIM11|SOD1|TFF2|SIK1|SIM2|TMPRSS15|TMPRSS2|TFF3|TIAM1|TMEM50B|SLC19A1|MRPS6|MX1|NCAM2|MORC3|MRAP|NDUFV3|NRIP1|SLC37A1|SLC5A3|MX2|N6AMT1|OLIG1|OLIG2|PAXBP1|KRTAP13-4|KRTAP15-1|MRPL39|KRTAP13-2|KRTAP13-3|KRTAP19-1|KRTAP19-2|KRTAP19-3|KRTAP19-4|KRTAP19-5…		See cases	VCV000394309	21	14771770 - 48080867			394309	381202			copy number gain		Pathogenic		no assertion criteria provided
GRCh37/hg19 21q22.3(chr21:45866973-48097372)x1	ITGB2|KRTAP10-1|KRTAP10-6|KRTAP10-7|LRRC3|UBE2G2|PTTG1IP|S100B|SLC19A1|SLX9|SPATC1L|SUMO3|TSPEAR|YBEY|KRTAP10-8|KRTAP10-9|KRTAP12-1|KRTAP12-2|KRTAP10-2|KRTAP10-4|KRTAP10-5|KRTAP12-3|KRTAP12-4|LINC00163|LINC00315|LINC00334|COL6A1|COL6A2|DIP2A|FTCD|KRTAP10-10|KRTAP10-11|KRTAP10-3|KRTAP10-12|ADARB1|C21orf58|COL18A1|LSS|MCM3AP|PCBP3|PCNT|POFUT2|PRMT2		not provided	VCV000816180	21	45866973 - 48097372			816180	804388			copy number loss		Uncertain significance	2023-08-31	criteria provided, single submitter
GRCh37/hg19 21q22.12-22.3(chr21:35872675-48097372)x1	KCNJ15|KCNJ6|RRP1|RRP1B|S100B|SH3BGR|RSPH1|RUNX1|SETD4|SIK1|SIM2|SLC19A1|SLC37A1|SLX9|KRTAP10-12|KRTAP10-2|KRTAP10-3|KRTAP10-4|KRTAP10-5|KRTAP10-6|SPATC1L|SUMO3|TFF1|TFF2|TFF3|KRTAP10-1|KRTAP10-10|KRTAP10-11|KRTAP10-7|KRTAP10-8|CBR1|CBR3|CBS|C2CD2|ADARB1|AGPAT3|KRTAP12-2|KRTAP12-3|KRTAP12-4|KRTAP10-9|KRTAP12-1|AIRE|B3GALT5|BACE2|BRWD1|C21orf58|ABCG1|CFAP410|CHAF1B|CLDN14|CLIC6|COL18A1|COL6A1|COL6…		not specified	VCV003062428	21	35872675 - 48097372			3062428	3222652			copy number loss		Pathogenic		criteria provided, single submitter
GRCh37/hg19 21q11.2-22.3(chr21:15041209-48097372)	KCNJ15|N6AMT1|NCAM2|PCP4|KRTAP10-1|KRTAP10-10|KRTAP10-11|KRTAP10-3|KRTAP10-4|KRTAP10-7|KRTAP10-8|NDUFV3|NRIP1|OLIG1|OLIG2|PAXBP1|PDE9A|PDXK|PFKL|ADARB1|AGPAT3|ABCG1|ADAMTS1|ADAMTS5|AIRE|APP|ATP5PF|ATP5PO|PCBP3|PCNT|KCNJ6|KRTAP10-12|KRTAP10-2|KRTAP10-5|KRTAP10-6|B3GALT5|BACE2|BACH1|BRWD1|BTG3|C21orf58|C21orf91|C2CD2|CBR1|CBR3|CBS|CCT8|CFAP298|CFAP410|CHAF1B|CHODL|CLDN14|CLDN17|CLDN8|CLIC6|COL18A1|…		not specified	VCV001526705	21	15041209 - 48097372			1526705	1518194			copy number gain		Pathogenic	2022-03-01	criteria provided, single submitter
Single allele	KRTAP10-12|KRTAP10-2|LOC126088095|LOC130066821|LOC130066822|LOC130066878|LOC130066879|LOC130066880|LOC130066886|LOC130066887|LRRC3|LRRC3-DT|PCBP3-AS1|PCNT|PDXK|PFKL|LOC130066883|LOC130066884|LOC130066823|LOC130066824|LOC130066830|LOC130066831|LOC130066834|LOC130066835|LOC130066836|LOC130066837|LOC130066825|LOC130066826|LOC130066827|LOC130066828|LOC130066829|LOC130066832|LOC130066833|LOC130066838|…		Autism	VCV000545245			21	43403441 - 46673937	545245	535509			Duplication		Likely pathogenic	2018-03-20	criteria provided, single submitter
GRCh37/hg19 21q22.11-22.3(chr21:34586759-48097372)x3	KRTAP10-2|KRTAP10-3|KRTAP10-4|KRTAP10-5|KRTAP10-6|KRTAP10-7|KRTAP10-8|KRTAP10-9|KRTAP12-1|KRTAP12-2|KRTAP12-3|KRTAP12-4|LCA5L|LINC00114|LINC00163|LINC00315|LINC00334|LRRC3|LSS|MCM3AP|MORC3|MRPS6|MX1|MX2|NDUFV3|PCBP3|PCNT|PCP4|PDE9A|PDXK|PFKL|PIGP|PKNOX1|PLAC4|POFUT2|PRDM15|PRMT2|PSMG1|PTTG1IP|PWP2|RCAN1|RIPK4|RIPPLY3|RRP1|RRP1B|RSPH1|RUNX1|S100B|SETD4|SH3BGR|SIK1|SIM2|SLC19A1|SLC37A1|SLC5A3|SLX9|…		not provided	VCV003391864	21	34586759 - 48097372			3391864	3550944			copy number gain		Pathogenic	2024-02-23	criteria provided, single submitter
GRCh37/hg19 21q22.3(chr21:45726806-48093361)x1	KRTAP10-4|KRTAP10-2|KRTAP10-3|KRTAP10-5|KRTAP10-6|COL6A2|KRTAP10-7|KRTAP10-12|COL6A1|ADARB1|C21orf58|CFAP410|COL18A1|DIP2A|FTCD|ITGB2|KRTAP10-1|KRTAP10-10|KRTAP10-11|KRTAP10-8|KRTAP10-9|KRTAP12-1|KRTAP12-2|KRTAP12-3|KRTAP12-4|LINC00163|LINC00315|LINC00334|LRRC3|LSS|MCM3AP|PCBP3|PCNT|PFKL|POFUT2|PRMT2|PTTG1IP|S100B|SLC19A1|SLX9|SPATC1L|SUMO3|TRPM2|TSPEAR|UBE2G2|YBEY		not provided	VCV003148842	21	45726806 - 48093361			3148842	3308090			copy number loss		Uncertain significance		criteria provided, single submitter
GRCh37/hg19 21q22.3(chr21:44577746-48097372)x1	KRTAP10-7|KRTAP10-8|KRTAP12-3|KRTAP10-9|KRTAP12-1|KRTAP12-2|ADARB1|AGPAT3|AIRE|C21orf58|CFAP410|COL18A1|COL6A1|COL6A2|CRYAA|CSTB|DIP2A|DNMT3L|FTCD|GATD3|HSF2BP|ICOSLG|ITGB2|KRTAP10-1|KRTAP10-10|KRTAP10-11|KRTAP10-12|KRTAP10-2|KRTAP10-3|KRTAP10-4|KRTAP10-5|KRTAP10-6|KRTAP12-4|LINC00163|LINC00315|LINC00334|LRRC3|LSS|MCM3AP|PCBP3|PCNT|PDXK|PFKL|POFUT2|PRMT2|PTTG1IP|PWP2|RRP1|RRP1B|S100B|SIK1|SLC19A1…		not specified	VCV003062430	21	44577746 - 48097372			3062430	3222654			copy number loss		Pathogenic		criteria provided, single submitter
GRCh38/hg38 21q11.2-22.3(chr21:7749532-46677460)	KRTAP8-1|LCA5L|LINC00111|LINC00112|LINC00113|LINC00114|LINC00158|LINC00159|LINC00160|LINC00161|LINC00163|LINC00165|LINC00189|LINC00205|LINC00307|LINC00308|LINC00310|LINC00313|LINC00314|LINC00315|LINC00316|LINC00317|LINC00319|LINC00320|LINC00322|LINC00323|LINC00334|LINC00479|LINC00515|LINC00649|LINC00945|LINC01423|LINC01424|LINC01425|LINC01426|LINC01436|LINC01547|LINC01548|LINC01549|LINC01666|LINC…		See cases	VCV000155093	21	14386013 - 48097372	21	7749532 - 46677460	155093	164847			copy number gain		Pathogenic	2013-04-02	no assertion criteria provided
GRCh38/hg38 21p11.2-q22.3(chr21:7749532-46670405)x3	LCA5L|LINC00111|LINC00112|LINC00113|LINC00114|LINC00158|LINC00159|LINC00160|LINC00161|LINC00163|LINC00165|LINC00189|LINC00205|LINC00307|LINC00308|LINC00310|LINC00313|LINC00314|LINC00315|LINC00316|LINC00317|LINC00319|LINC00320|LINC00322|LINC00323|LINC00334|LINC00479|LINC00515|LINC00649|LINC00945|LINC01423|LINC01424|LINC01425|LINC01426|LINC01436|LINC01547|LINC01548|LINC01549|LINC01666|LINC01667|LIN…		See cases	VCV000160886	21	15499847 - 48090317	21	7749532 - 46670405	160886	170730			copy number gain		Pathogenic	2011-08-12	criteria provided, multiple submitters, no conflicts
GRCh37/hg19 21q22.3(chr21:46569368-46842469)x3	LINC00334|POFUT2|ADARB1|LINC00315|COL18A1		not provided	VCV000564650	21	46569368 - 46842469			564650	555834			copy number gain		Likely benign	2018-05-08	no assertion criteria provided
GRCh37/hg19 21q22.3(chr21:46624646-46923814)x3	LINC00334|LINC00315|ADARB1|POFUT2|COL18A1		See cases	VCV000253823	21	46624646 - 46923814			253823	248271			copy number gain		Uncertain significance	2016-01-20	criteria provided, single submitter
GRCh38/hg38 21p11.2-q22.3(chr21:7749532-46670440)x3	LINC00515|LINC00649|LINC00945|LINC01423|LINC01424|LINC01425|LINC01426|LINC01436|LINC01547|LINC01548|LINC01549|LINC01666|LINC01667|LINC01668|LINC01671|LINC01673|LINC01674|LINC01678|LINC01679|LINC01683|LINC01684|LINC01687|LINC01689|LINC01690|LINC01692|LINC01694|LINC01695|LINC01697|LINC01700|LINC02573|LINC02575|LINC02920|LINC02940|LINC02943|LINC03039|LIPI|LOC100506403|LOC101927745|LOC101928107|LOC10…		See cases	VCV000145474	21	15513244 - 48090352	21	7749532 - 46670440	145474	155225			copy number gain		Pathogenic	2010-09-30	no assertion criteria provided
GRCh38/hg38 21q22.12-22.3(chr21:34789953-46636538)x1	LINC01424|LINC01436|LINC01547|LINC01668|LINC01671|LINC01678|LINC01679|LINC01694|LINC01700|LINC02575|LINC02940|LINC02943|LINC03039|LOC100506403|LOC101928212|LOC101928269|LOC101928398|LOC101928796|LOC105369306|LOC105369308|LOC105372832|LOC107548109|LOC107548111|LOC108251799|LOC108254685|LOC108281139|LOC108281150|LOC108281151|LOC108281168|LOC109029533|LOC109648314|LOC109648316|LOC109648317|LOC110121…		See cases	VCV000147667	21	36162250 - 48056450	21	34789953 - 46636538	147667	157418			copy number loss		Pathogenic	2010-10-14	no assertion criteria provided
GRCh38/hg38 21p11.2-q22.3(chr21:7749532-46661140)x3	LINC01425|LINC01426|LINC01436|LINC01547|LINC01548|LINC01549|LINC01666|LINC01667|LINC01668|LINC01671|LINC01673|LINC01674|LINC01678|LINC01679|LINC01683|LINC01684|LINC01687|LINC01689|LINC01690|LINC01692|LINC01694|LINC01695|LINC01697|LINC01700|LINC02573|LINC02575|LINC02920|LINC02940|LINC02943|LINC03039|LIPI|LOC100506403|LOC101927745|LOC101928107|LOC101928126|LOC101928212|LOC101928269|LOC101928398|LOC…		See cases	VCV000059245	21	15499847 - 48081052	21	7749532 - 46661140	59245	73840			copy number gain		Pathogenic	2011-08-12	criteria provided, single submitter
GRCh38/hg38 21p11.2-q22.3(chr21:7749532-46670405)x3	LOC112694754|LOC114004360|LOC114827853|LOC116309120|LOC116309121|LOC121627918|LOC121853025|LOC121853026|LOC121853027|LOC125418052|LOC125418053|LOC125418054|LOC125418071|LOC125418072|LOC125418073|LOC126088095|LOC126653312|LOC126653326|LOC126653327|LOC126653344|LOC126653345|LOC126653346|LOC126653361|LOC126653362|LOC126653375|LOC126653393|LOC126653394|LOC126653395|LOC128462415|LOC128462416|LOC128772…		See cases	VCV000032099	21	15499847 - 48090317	21	7749532 - 46670405	32099	40764			copy number gain		Pathogenic	2014-12-19	no assertion criteria provided
GRCh38/hg38 21q22.3(chr21:44576109-45204790)x3	LOC125418085|LOC126653399|LOC126653400|LOC130066831|LOC130066832|LOC130066833|LOC130066834|LOC130066835|LOC130066836|LOC130066837|LOC130066838|LOC130066839|LOC130066840|LOC130066841|LOC130066842|LOC130066843|LOC130066844|LOC130066845|LOC130066846|LOC130066847|LOC130066848|LOC130066849|PICSAR|PTTG1IP|SLX9|SUMO3|TSPEAR|UBE2G2|KRTAP10-12|ADARB1|ITGB2|ITGB2-AS1|KRTAP10-10|KRTAP10-11|KRTAP10-5|KRTAP10…		See cases	VCV000150020	21	45995986 - 46624705	21	44576109 - 45204790	150020	159771			copy number gain		Uncertain significance	2012-09-17	no assertion criteria provided
GRCh38/hg38 21q11.2-22.3(chr21:7749532-46677460)x3	LOC126653353|LOC126653354|LOC126653355|LOC126653356|LOC126653357|LOC126653358|LOC126653359|LOC126653360|LOC126653361|LOC126653362|LOC126653363|LOC126653364|LOC126653365|LOC126653366|LOC126653367|LOC126653368|LOC126653369|LOC126653370|LOC126653371|LOC126653372|LOC126653373|LOC126653374|LOC126653375|LOC126653376|LOC126653377|LOC126653378|LOC126653379|LOC126653380|LOC126653381|LOC126653382|LOC126653…		See cases	VCV000155309	21	15006458 - 48097372	21	7749532 - 46677460	155309	165063			copy number gain		Pathogenic	2016-02-11	no assertion criteria provided
GRCh38/hg38 21p11.2-q22.3(chr21:7749532-46671060)x3	LOC126653353|LOC126653354|LOC126653355|LOC126653356|LOC126653357|LOC126653358|LOC126653359|LOC126653360|LOC126653361|LOC126653362|LOC126653363|LOC126653364|LOC126653365|LOC126653366|LOC126653367|LOC126653368|LOC126653369|LOC126653370|LOC126653371|LOC126653372|LOC126653373|LOC126653374|LOC126653375|LOC126653376|LOC126653377|LOC126653378|LOC126653379|LOC126653380|LOC126653381|LOC126653382|LOC126653…		See cases	VCV000149418	21	15451032 - 48090972	21	7749532 - 46671060	149418	159169			copy number gain		Pathogenic	2013-02-13	no assertion criteria provided
GRCh38/hg38 21p11.2-q22.3(chr21:7749532-46671060)x3	LOC129388418|LOC129391214|LOC129391215|LOC129391216|LOC129391217|LOC129391218|LOC129391219|LOC129391220|LOC129391221|LOC129391222|LOC129391223|LOC129391224|LOC129391225|LOC129391226|LOC129391227|LOC129391228|LOC129391229|LOC129391230|LOC129391231|LOC129391232|LOC129391233|LOC129391234|LOC129391235|LOC129391236|LOC129391237|LOC129391238|LOC129391239|LOC129391240|LOC129391241|LOC129391242|LOC129391…		See cases	VCV000149160	21	10944001 - 48090972	21	7749532 - 46671060	149160	158911			copy number gain		Pathogenic	2012-03-09	no assertion criteria provided
GRCh38/hg38 21p11.2-q22.3(chr21:7749532-46623792)x3	LOC130066468|LOC130066469|LOC130066470|LOC130066471|LOC130066472|LOC130066473|LOC130066474|LOC130066475|LOC130066476|LOC130066477|LOC130066478|LOC130066479|LOC130066480|LOC130066481|LOC130066482|LOC130066483|LOC130066484|LOC130066485|LOC130066486|LOC130066487|LOC130066488|LOC130066489|LOC130066490|LOC130066491|LOC130066492|LOC130066493|LOC130066494|LOC130066495|LOC130066496|LOC130066497|LOC130066…		See cases	VCV000059223	21	14595524 - 48043704	21	7749532 - 46623792	59223	73818			copy number gain		Pathogenic	2011-08-12	criteria provided, single submitter
GRCh38/hg38 21p11.2-q22.3(chr21:7749532-46670440)x3	LOC130066726|LOC130066727|LOC130066728|LOC130066729|LOC130066730|LOC130066731|LOC130066732|LOC130066733|LOC130066734|LOC130066735|LOC130066736|LOC130066737|LOC130066738|LOC130066739|LOC130066740|LOC130066741|LOC130066742|LOC130066743|LOC130066744|LOC130066745|LOC130066746|LOC130066747|LOC130066748|LOC130066749|LOC130066750|LOC130066751|LOC130066752|LOC130066753|LOC130066754|LOC130066755|LOC130066…		See cases	VCV000144677	21	15485038 - 48090352	21	7749532 - 46670440	144677	154428			copy number gain		Pathogenic	2012-09-21	no assertion criteria provided
GRCh38/hg38 21p11.2-q22.3(chr21:7749532-46664250)x3	LOC130066731|LOC130066732|LOC130066733|LOC130066734|LOC130066735|LOC130066736|LOC130066737|LOC130066738|LOC130066739|LOC130066740|LOC130066741|LOC130066742|LOC130066743|LOC130066744|LOC130066745|LOC130066746|LOC130066747|LOC130066748|LOC130066749|LOC130066750|LOC130066751|LOC130066752|LOC130066753|LOC130066754|LOC130066755|LOC130066756|LOC130066757|LOC130066758|LOC130066759|LOC130066760|LOC130066…		See cases	VCV000145468	21	15485038 - 48084162	21	7749532 - 46664250	145468	155219			copy number gain		Pathogenic	2010-09-30	no assertion criteria provided
GRCh38/hg38 21q22.3(chr21:42129699-46671060)x1	LOC130066735|LOC130066736|LOC130066737|LOC130066738|LOC130066739|LOC130066740|LOC130066741|LOC130066742|LOC130066743|LOC130066744|LOC130066745|LOC130066746|LOC130066747|LOC130066748|LOC130066749|LOC130066750|LOC130066751|LOC130066752|LOC130066753|LOC130066754|LOC130066755|LOC130066756|LOC130066757|LOC130066758|LOC130066759|LOC130066760|LOC130066761|LOC130066762|LOC130066763|LOC130066764|LOC130066…		See cases	VCV000155268	21	43549809 - 48090972	21	42129699 - 46671060	155268	165022			copy number loss		Pathogenic	2013-01-14	no assertion criteria provided
GRCh38/hg38 21q22.12-22.3(chr21:36206067-46670405)x3	LOC130066759|LOC130066760|LOC130066761|LOC130066762|LOC130066763|LOC130066764|LOC130066765|LOC130066766|LOC130066767|LOC130066768|LOC130066769|LOC130066770|LOC130066771|LOC130066772|LOC130066773|LOC130066774|LOC130066775|LOC130066776|LOC130066777|LOC130066778|LOC130066779|LOC130066780|LOC130066781|LOC130066782|LOC130066783|LOC130066784|LOC130066785|LOC130066786|LOC130066787|LOC130066788|LOC130066…		See cases	VCV000145644	21	37578365 - 48090317	21	36206067 - 46670405	145644	155395			copy number gain		Pathogenic	2011-01-05	no assertion criteria provided
GRCh38/hg38 21p11.2-q22.3(chr21:7817158-46670440)x1	LOC130066795|LOC130066796|LOC130066797|LOC130066798|LOC130066799|LOC130066800|LOC130066801|LOC130066802|LOC130066803|LOC130066804|LOC130066805|LOC130066806|LOC130066807|LOC130066808|LOC130066809|LOC130066810|LOC130066811|LOC130066812|LOC130066813|LOC130066814|LOC130066815|LOC130066816|LOC130066817|LOC130066818|LOC130066819|LOC130066820|LOC130066821|LOC130066822|LOC130066823|LOC130066824|LOC130066…		See cases	VCV000154360	21	15485038 - 48090352	21	7817158 - 46670440	154360	164114			copy number loss		Pathogenic	2012-09-21	no assertion criteria provided
GRCh38/hg38 21q21.3-22.3(chr21:7749532-46677460)x3	LOC130066804|LOC130066805|LOC130066806|LOC130066807|LOC130066808|LOC130066809|LOC130066810|LOC130066811|LOC130066812|LOC130066813|LOC130066814|LOC130066815|LOC130066816|LOC130066817|LOC130066818|LOC130066819|LOC130066820|LOC130066821|LOC130066822|LOC130066823|LOC130066824|LOC130066825|LOC130066826|LOC130066827|LOC130066828|LOC130066829|LOC130066830|LOC130066831|LOC130066832|LOC130066833|LOC130066…		See cases	VCV000153438	21	28285299 - 48097372	21	7749532 - 46677460	153438	163189			copy number gain		Uncertain significance	2013-06-11	no assertion criteria provided
GRCh38/hg38 21q22.3(chr21:42232926-46670405)x1	LOC130066806|LOC130066807|LOC130066808|LOC130066809|LOC130066810|LOC130066811|LOC130066812|LOC130066813|LOC130066814|LOC130066815|LOC130066816|LOC130066817|LOC130066818|LOC130066819|LOC130066820|LOC130066821|LOC130066822|LOC130066823|LOC130066824|LOC130066825|LOC130066826|LOC130066827|LOC130066828|LOC130066829|LOC130066830|LOC130066831|LOC130066832|LOC130066833|LOC130066834|LOC130066835|LOC130066…		See cases	VCV000057115	21	43653036 - 48090317	21	42232926 - 46670405	57115	71710			copy number loss		Pathogenic	2011-08-12	criteria provided, single submitter
GRCh38/hg38 21p11.2-q22.3(chr21:7749532-46623792)x3	LOC130066861|LOC130066862|LOC130066863|LOC130066864|LOC130066865|LOC130066866|LOC130066867|LOC130066868|LOC130066869|LOC130066870|LOC130066871|LOC130066872|LOC130066873|LOC130066874|LOC130066875|LOC130066876|LOC130066877|LOC130066878|LOC130066879|LOC130066880|LOC130066881|LOC130066882|LOC130066883|LOC130066884|LOC132090607|LOC132090608|LOC132090609|LOC132090610|LOC132090611|LOC132090612|LOC132090…		See cases	VCV000059224	21	14629063 - 48043704	21	7749532 - 46623792	59224	73819			copy number gain		Pathogenic	2011-08-12	criteria provided, single submitter
GRCh37/hg19 21q22.3(chr21:46456779-46892739)x3	POFUT2|ADARB1|COL18A1|LINC00315|LINC00334		not provided	VCV001341271	21	46456779 - 46892739			1341271	1332479			copy number gain		Uncertain significance	2021-03-01	no assertion criteria provided
GRCh37/hg19 21q22.3(chr21:46597460-46933696)x4	POFUT2|LINC00334|COL18A1|ADARB1|LINC00315		not provided	VCV000816183	21	46597460 - 46933696			816183	804391			copy number gain		Uncertain significance	2019-04-16	no assertion criteria provided
GRCh38/hg38 21q11.2-22.3(chr21:7749532-46677460)x3	RNA5-8SN1|RNA5-8SN2|RNA5-8SN3|RRP1|RRP1B|RSPH1|RSPH1-DT|RUNX1|RUNX1-AS1|RUNX1-IT1|RWDD2B|S100B|SAMSN1|SAMSN1-AS1|SCAF4|SETD4|SETD4-AS1|SH3BGR|SIK1|SIM2|SLC19A1|SLC37A1|SLC5A3|SLX9|SMIM11|SMIM34|SNORA80A|SNORA91|SNORD159|SNORD74B|SOD1|SOD1-DT|SON|SPATC1L|SUMO3|SYNJ1|TCP10L|TFF1|TFF2|TFF3|TIAM1|TIAM1-AS1|TMEM50B|TMPRSS15|TMPRSS2|TMPRSS3|TPTE|TRAPPC10|TRG-GCC1-5|TRPM2|TRPM2-AS|TSPEAR|TSPEAR-AS1|TSPE…		See cases	VCV000155053	21	15006457 - 48097372	21	7749532 - 46677460	155053	164807			copy number gain		Pathogenic	2013-12-03	no assertion criteria provided
GRCh38/hg38 21q11.2-22.3(chr21:7749532-46670346)x3	SCAF4|SETD4|SETD4-AS1|SH3BGR|SIK1|SIM2|SLC19A1|SLC37A1|SLC5A3|SLX9|SMIM11|SMIM34|SNORA80A|SNORA91|SNORD159|SNORD74B|SOD1|SOD1-DT|SON|SPATC1L|SUMO3|SYNJ1|TCP10L|TFF1|TFF2|TFF3|TIAM1|TIAM1-AS1|TMEM50B|TMPRSS15|TMPRSS2|TMPRSS3|TPTE|TRAPPC10|TRG-GCC1-5|TRPM2|TRPM2-AS|TSPEAR|TSPEAR-AS1|TSPEAR-AS2|TTC3|TTC3-AS1|U2AF1|UBASH3A|UBE2G2|UMODL1|UMODL1-AS1|URB1|URB1-AS1|USP16|USP25|VPS26C|WDR4|YBEY|ZBTB21|ZNF…		See cases	VCV000151388	21	14577894 - 48090258	21	7749532 - 46670346	151388	161139			copy number gain		Pathogenic	2011-04-30	no assertion criteria provided
GRCh38/hg38 21p11.2-q22.3(chr21:7749532-46670405)x3	SLC5A3|SLX9|SMIM11|SMIM34|SNORA80A|SNORA91|SNORD159|SNORD74B|SOD1|SOD1-DT|SON|SPATC1L|SUMO3|SYNJ1|TCP10L|TFF1|TFF2|TFF3|TIAM1|TIAM1-AS1|TMEM50B|TMPRSS15|TMPRSS2|TMPRSS3|TPTE|TRAPPC10|TRG-GCC1-5|TRPM2|TRPM2-AS|TSPEAR|TSPEAR-AS1|TSPEAR-AS2|TTC3|TTC3-AS1|U2AF1|UBASH3A|UBE2G2|UMODL1|UMODL1-AS1|URB1|URB1-AS1|USP16|USP25|VPS26C|WDR4|YBEY|ZBTB21|ZNF295-AS1|LOC130066494|LOC130066495|LOC130066496|LOC13006…		See cases	VCV000059246	21	20655360 - 48090317	21	7749532 - 46670405	59246	73841			copy number gain		Pathogenic	2011-08-12	criteria provided, single submitter
GRCh37/hg19 21q22.3(chr21:46321547-46556804)x3	SLX9|ITGB2|LINC00163|ADARB1		not provided	VCV000980240	21	46321547 - 46556804			980240	968318			copy number gain		Uncertain significance	2020-04-08	no assertion criteria provided
GRCh37/hg19 21q22.3(chr21:45808650-47529568)x1	SUMO3|TRPM2|TSPEAR|UBE2G2|ADARB1|COL18A1|COL6A1|COL6A2|ITGB2|KRTAP10-1|KRTAP10-10|KRTAP10-11|KRTAP10-12|KRTAP10-2|KRTAP10-3|KRTAP10-4|KRTAP10-5|KRTAP10-6|KRTAP10-7|KRTAP10-8|KRTAP10-9|KRTAP12-1|KRTAP12-2|KRTAP12-3|KRTAP12-4|LINC00163|LINC00315|LINC00334|LRRC3|PCBP3|POFUT2|PTTG1IP|SLC19A1|SLX9		not provided	VCV001710511	21	45808650 - 47529568			1710511	1708922			copy number loss		Pathogenic	2021-12-06	criteria provided, single submitter
GRCh37/hg19 21q22.3(chr21:45996567-46593248)x3	TSPEAR|LINC00163|KRTAP10-9|KRTAP12-2|KRTAP10-6|KRTAP10-11|KRTAP12-4|ADARB1|ITGB2|KRTAP12-1|KRTAP10-7|UBE2G2|KRTAP10-10|KRTAP12-3|KRTAP10-8|SUMO3|KRTAP10-12|PTTG1IP|SLX9|KRTAP10-5		not provided	VCV000816181	21	45996567 - 46593248			816181	804389			copy number gain		Uncertain significance	2019-06-05	no assertion criteria provided

## Sheet: 2. Narrowed down list
Name	Gene(s)	Residue	Amino acid change	Variant ID	Submitter	Allelic status	Information from submitters	In /B 6VFF	In /A 6VFF2	Contacts	Condition(s)	Accession	GRCh37Chromosome	GRCh37Location	GRCh38Chromosome	GRCh38Location	VariationID	AlleleID(s)	dbSNP ID	Canonical SPDI	Variant type	Molecular consequence	Germline classification	Germline date last evaluated	Germline review status	Somatic clinical impact	Somatic clinical impact date last evaluated	Somatic clinical impact review status	Oncogenicity classification	Oncogenicity date last evaluated	Oncogenicity review status
NM_001112.4(ADARB1):c.724G>A (p.Glu242Lys)	ADARB1	242	E242K	3268741	Ambry Genetics	Monoallelic	N/A	Y	N	In B:makes 2-OH contact with dsRNA	Inborn genetic diseases	VCV003268741	21	46596340	21	45176425	3268741	3423110		NC_000021.9:45176424:G:A	single nucleotide variant	missense variant|non-coding transcript variant	Uncertain significance	2024-03-20	criteria provided, single submitter
NM_001112.4(ADARB1):c.827G>T (p.Gly276Val)	ADARB1	276	G276V	3341324	Neuberg Centre For Genomic Medicine (NCGM), NCGM	Biallelic	The proband in our case was a female born to consanguineous union who was investigated for refractory seizures which began on day 4 of life. Her basic metabolic screening was normal. We currently have no other follow up. It is homozygous : parental testing was not performed.	Y	N		Neurodevelopmental disorder with hypotonia, microcephaly, and seizures	VCV003341324	21	46596443	21	45176528	3341324	3500560		NC_000021.9:45176527:G:T	single nucleotide variant	missense variant|non-coding transcript variant	Uncertain significance	2023-05-20	criteria provided, single submitter
NM_001112.4(ADARB1):c.830C>T (p.Ser277Leu)	ADARB1	277	S277L	2549651	Ambry Genetics	Monoallelic	N/A	Y	N	Within the monomer	Inborn genetic diseases	VCV002549651	21	46596446	21	45176531	2549651	2725222		NC_000021.9:45176530:C:T	single nucleotide variant	missense variant|non-coding transcript variant	Uncertain significance	2023-05-23	criteria provided, single submitter
NM_001112.4(ADARB1):c.860G>A (p.Arg287Gln)	ADARB1	287	R287Q	3493432	Ambry Genetics	Monoallelic	N/A	Y	N	Within the monomer	Inborn genetic diseases	VCV003493432	21	46596476	21	45176561	3493432	3660322		NC_000021.9:45176560:G:A	single nucleotide variant	missense variant|non-coding transcript variant	Uncertain significance	2024-11-24	criteria provided, single submitter
NM_001112.4(ADARB1):c.860G>T (p.Arg287Leu)	ADARB1	287	R287L	3493412	Ambry Genetics	Monoallelic	N/A	Y	N	Within the monomer	Inborn genetic diseases	VCV003493412	21	46596476	21	45176561	3493412	3660302		NC_000021.9:45176560:G:T	single nucleotide variant	missense variant|non-coding transcript variant	Uncertain significance	2024-10-19	criteria provided, single submitter
NM_001112.4(ADARB1):c.985C>T (p.Arg329Cys)	ADARB1	329	R329C	2278963	Ambry Genetics	Monoallelic	N/A	Y	Y	Within the monomer	Inborn genetic diseases	VCV002278963	21	46600266	21	45180351	2278963	2272670		NC_000021.9:45180350:C:T	single nucleotide variant	missense variant|non-coding transcript variant	Uncertain significance	2022-03-16	criteria provided, single submitter
NM_001112.4(ADARB1):c.1034C>T (p.Pro345Leu)	ADARB1	345	P345L	3380681	Mayo Clinic Laboratories, Mayo Clinic	Monoallelic	This variant was found as heterozygous in a <1yr Male patient with a history of hypoxia, ischemic encephalopathy, possible seizures, arrhythmia, and hypotonia with onset at birth. No significant family history reported. The variant was identified on our epilepsy panel with no second variant in ADARB1 or alternative diagnosis identified. Parental testing was not completed. The paperwork has a chec…	Y	Y	Within the monomer	not provided	VCV003380681	21	46600315	21	45180400	3380681	3539854		NC_000021.9:45180399:C:T	single nucleotide variant	missense variant|non-coding transcript variant	Uncertain significance	2024-04-09	criteria provided, single submitter
NM_001112.4(ADARB1):c.1102G>T (p.Val368Leu)	ADARB1	368	V368L	2606467	Ambry Genetics Genetics	Monoallelic	N/A	Y	Y	Within the monomer	Inborn genetic diseases	VCV002606467	21	46602523	21	45182608	2606467	2768898		NC_000021.9:45182607:G:T	single nucleotide variant	missense variant|non-coding transcript variant	Uncertain significance	2023-06-26	criteria provided, single submitter
NM_001112.4(ADARB1):c.1204T>G (p.Ser402Ala)	ADARB1	402	S402A	3268738	Ambry Genetics Genetics	Monoallelic	N/A	Y	Y	Within the monomer	Inborn genetic diseases	VCV003268738	21	46602625	21	45182710	3268738	3423107		NC_000021.9:45182709:T:G	single nucleotide variant	missense variant|non-coding transcript variant	Uncertain significance	2024-06-10	criteria provided, single submitter
NM_001112.4(ADARB1):c.1457C>T (p.Ser486Phe)	ADARB1	486	S486F	2480838	Ambry Genetics	Monoallelic	N/A	Y	Y	In A:dsRNA contact	Inborn genetic diseases	VCV002480838	21	46604898	21	45184983	2480838	2454555		NC_000021.9:45184982:C:T	single nucleotide variant	missense variant|non-coding transcript variant	Uncertain significance	2023-02-06	criteria provided, single submitter
NM_001112.4(ADARB1):c.1489G>A (p.Ala497Thr)	ADARB1	497	A497T	3493401	Ambry Genetics	Monoallelic	N/A	N	Y	Within the monomer	Inborn genetic diseases	VCV003493401	21	46604930	21	45185015	3493401	3660291		NC_000021.9:45185014:G:A	single nucleotide variant	missense variant|non-coding transcript variant	Uncertain significance	2024-09-11	criteria provided, single submitter
NM_001112.4(ADARB1):c.1564C>T (p.Arg522Cys)	ADARB1	522	R522C	2300221	Ambry Genetics	Monoallelic	N/A	Y	Y	Within the monomer	Inborn genetic diseases	VCV002300221	21	46605005	21	45185090	2300221	2289136		NC_000021.9:45185089:C:T	single nucleotide variant	missense variant|non-coding transcript variant	Uncertain significance	2022-07-08	criteria provided, single submitter
NM_001112.4(ADARB1):c.1573G>A (p.Val525Met)	ADARB1	525	V525M	2431949	Laboratorio de Genetica e Diagnostico Molecular, Hospital Israelita Albert Einstein	N/A	No response	Y	Y	Within the monomer	Neurodevelopmental disorder with hypotonia, microcephaly, and seizures	VCV002431949	21	46624477	21	45204562	2431949	2405453		NC_000021.9:45204561:G:A	single nucleotide variant	missense variant|non-coding transcript variant	Uncertain significance	2022-12-14	criteria provided, single submitter
NM_001112.4(ADARB1):c.1582A>G (p.Ile528Val)	ADARB1	528	I528V	218725	CeGaT Center for Human Genetics Tuebingen	Common variant (58 times as monoallelic and 10,859 times as biallelic)	The ADARB1 variant (ClinVar Variant ID: 218725) was analyzed and classified in 10 cases, but it is actually a very common variant, present in over 800 cases analyzed in-house. Additionally, it has been identified 58 times in the homozygous state and 10,859 times in the heterozygous state in the gnomAD cohort. Due to the high number of variant carriers, who have various indications, it is not poss…	Y	Y	Within the monomer	not provided|not specified	VCV000218725	21	46624486	21	45204571	218725	215593	rs146201109	NC_000021.9:45204570:A:G	single nucleotide variant	missense variant|non-coding transcript variant	Conflicting classifications of pathogenicity	2023-05-01	criteria provided, conflicting classifications
NM_001112.4(ADARB1):c.1628C>T (p.Ser543Leu)	ADARB1	543	S543L	3370262	GeneDx	Phase unknown	This variant has been seen phase unknown with another missense variant in an individual with global developmental delay and hypotonia.	Y	Y	Within the monomer	not provided	VCV003370262	21	46624532	21	45204617	3370262	3529453		NC_000021.9:45204616:C:T	single nucleotide variant	missense variant|non-coding transcript variant	Uncertain significance	2023-12-29	criteria provided, single submitter
NM_001112.4(ADARB1):c.1769G>A (p.Arg590Gln)	ADARB1	590	R590Q	2443914	Ambry Genetics	Monoallelic	N/A	Y	Y	In B:makes contact with A dimerization helix	Neurodevelopmental disorder with hypotonia, microcephaly, and seizures	VCV002443914	21	46640772	21	45220857	2443914	2417651		NC_000021.9:45220856:G:A	single nucleotide variant	missense variant|non-coding transcript variant	Pathogenic	2023-03-10	no assertion criteria provided
NM_001112.4(ADARB1):c.1822G>A (p.Ala608Thr)	ADARB1	608	A608T	2323716	Ambry Genetics	Monoallelic	N/A	Y	Y	Within the monomer	Inborn genetic diseases	VCV002323716	21	46640825	21	45220910	2323716	2312181		NC_000021.9:45220909:G:A	single nucleotide variant	missense variant|non-coding transcript variant	Uncertain significance	2022-11-08	criteria provided, single submitter
NM_001112.4(ADARB1):c.1825A>G (p.Ile609Val)	ADARB1	609	I609V	2210520	Ambry Genetics	Monoallelic	N/A	Y	Y	Within the monomer	Inborn genetic diseases	VCV002210520	21	46640828	21	45220913	2210520	2197855		NC_000021.9:45220912:A:G	single nucleotide variant	missense variant|non-coding transcript variant	Uncertain significance	2022-12-01	criteria provided, single submitter
NM_001112.4(ADARB1):c.1847C>A (p.Thr616Asn)	ADARB1	616	T616N	3340382	GeneDx	Phase unknown	This variant has been seen phase unknown with another missense variant in an individual with global developmental delay and hypotonia	Y	Y	Within the monomer	not provided	VCV003340382	21	46640850	21	45220935	3340382	3499638		NC_000021.9:45220934:C:A	single nucleotide variant	missense variant|non-coding transcript variant	Uncertain significance	2023-12-29	criteria provided, single submitter
NM_001112.4(ADARB1):c.1868G>A (p.Arg623His)	ADARB1	623	R623H	2605150	Ambry Genetics	Monoallelic	N/A	Y	Y	Within the monomer	Inborn genetic diseases	VCV002605150	21	46640871	21	45220956	2605150	2778818		NC_000021.9:45220955:G:A	single nucleotide variant	missense variant|non-coding transcript variant	Uncertain significance	2023-06-22	criteria provided, single submitter
NM_001112.4(ADARB1):c.1898A>G (p.Tyr633Cys)	ADARB1	633	Y633C	3493389	Ambry Genetics	Monoallelic	N/A	Y	Y	Within the monomer	Inborn genetic diseases	VCV003493389	21	46640901	21	45220986	3493389	3660279		NC_000021.9:45220985:A:G	single nucleotide variant	missense variant|non-coding transcript variant|intron variant	Uncertain significance	2024-07-27	criteria provided, single submitter
NM_001112.4(ADARB1):c.1969G>A (p.Val657Met)	ADARB1	657	V657M	2290134	Ambry Genetics	Monoallelic	N/A	Y	Y	Within the monomer	Inborn genetic diseases	VCV002290134	21	46641975	21	45222060	2290134	2285984		NC_000021.9:45222059:G:A	single nucleotide variant	missense variant|non-coding transcript variant	Likely benign	2022-05-18	criteria provided, single submitter
NM_001112.4(ADARB1):c.1987C>G (p.Leu663Val)	ADARB1	663	L663V	3080260	Ambry Genetics	Monoallelic	N/A	Y	Y	Within the monomer	Inborn genetic diseases	VCV003080260	21	46641993	21	45222078	3080260	3246517		NC_000021.9:45222077:C:G	single nucleotide variant	missense variant|3 prime UTR variant|non-coding transcript variant	Uncertain significance	2023-12-14	criteria provided, single submitter
NM_001112.4(ADARB1):c.1993G>T (p.Ala665Ser)	ADARB1	665	A665S	977316	Génétique des Maladies du Développement, Hospices Civils de Lyon	Biallelic	This ADARB1 biallelic variant was ruled out because of an alternative molecular diagnosis that was clearly responsible for the phenotype with no doubt on a dual diagnosis.	Y	Y	Within the monomer	Encephalopathy|Microcephaly|Abnormal CNS myelination	VCV000977316	21	46641999	21	45222084	977316	965446	rs1344272743	NC_000021.9:45222083:G:T	single nucleotide variant	missense variant|3 prime UTR variant|non-coding transcript variant	Benign		criteria provided, single submitter
NM_001112.4(ADARB1):c.2021G>A (p.Arg674His)	ADARB1	674	R674H	2365870	Ambry Genetics	Monoallelic (Compound het)	encephalopathy, seizures, global developmental delay, behavioral issues, and dysmorphic features, agenesis of the corpus callosum, gray matter heterotopia involving the right frontal lobe, and multiple small foci of T2 hyperintensity.	Y	Y	Within the monomer	Inborn genetic diseases	VCV002365870	21	46642027	21	45222112	2365870	2350311		NC_000021.9:45222111:G:A	single nucleotide variant	missense variant|non-coding transcript variant|intron variant	Uncertain significance	2022-04-13	criteria provided, single submitter
NM_001112.4(ADARB1):c.2077G>A (p.Glu693Lys)	ADARB1	693	E693K	3493423	Ambry Genetics	Monoallelic	N/A	Y	Y	In A:makes contact with monomer B	Inborn genetic diseases	VCV003493423	21	46642083	21	45222168	3493423	3660313		NC_000021.9:45222167:G:A	single nucleotide variant	missense variant|non-coding transcript variant|intron variant	Uncertain significance	2024-11-14	criteria provided, single submitter

## Sheet: 3. Selected list
Name	Gene(s)	Residue	Amino acid change	Variant ID	Submitter	Allelic status	Information from submitters	In /B 6VFF	In /A 6VFF2	Contacts	Condition listed in ClinVar	Accession	GRCh37Chromosome	GRCh37Location	GRCh38Chromosome	GRCh38Location	VariationID	AlleleID(s)	dbSNP ID	Canonical SPDI	Variant type	Molecular consequence	Germline classification	Germline date last evaluated	Germline review status	Somatic clinical impact	Somatic clinical impact date last evaluated	Somatic clinical impact review status	Oncogenicity classification	Oncogenicity date last evaluated	Oncogenicity review status
NM_001112.4(ADARB1):c.827G>T (p.Gly276Val)	ADARB1	276	G276V	3341324	Neuberg Centre For Genomic Medicine (NCGM), NCGM	Biallelic	The proband in our case was a female born to consanguineous union who was investigated for refractory seizures which began on day 4 of life. Her basic metabolic screening was normal. We currently have no other follow up. It is homozygous : parental testing was not performed.	Y	N	Within the monomer	Neurodevelopmental disorder with hypotonia, microcephaly, and seizures	VCV003341324	21	46596443	21	45176528	3341324	3500560		NC_000021.9:45176527:G:T	single nucleotide variant	missense variant|non-coding transcript variant	Uncertain significance	45066	criteria provided, single submitter
NM_001112.4(ADARB1):c.1034C>T (p.Pro345Leu)	ADARB1	345	P345L	3380681	Mayo Clinic Laboratories, Mayo Clinic	Monoallelic	This variant was found as heterozygous in a <1yr Male patient with a history of hypoxia, ischemic encephalopathy, possible seizures, arrhythmia, and hypotonia with onset at birth. No significant family history reported. The variant was identified on our epilepsy panel with no second variant in ADARB1 or alternative diagnosis identified. Parental testing was not completed. The paperwork has a chec…	Y	Y	Within the monomer	not provided	VCV003380681	21	46600315	21	45180400	3380681	3539854		NC_000021.9:45180399:C:T	single nucleotide variant	missense variant|non-coding transcript variant	Uncertain significance	45391	criteria provided, single submitter
NM_001112.4(ADARB1):c.1582A>G (p.Ile528Val)	ADARB1	528	I528V	218725	CeGaT Center for Human Genetics Tuebingen	Common variant (58 times as monoallelic and 10,859 times as biallelic)	The ADARB1 variant (ClinVar Variant ID: 218725) was analyzed and classified in 10 cases, but it is actually a very common variant, present in over 800 cases analyzed in-house. Additionally, it has been identified 58 times in the homozygous state and 10,859 times in the heterozygous state in the gnomAD cohort. Due to the high number of variant carriers, who have various indications, it is not poss…	Y	Y	Within the monomer	not provided|not specified	VCV000218725	21	46624486	21	45204571	218725	215593	rs146201109	NC_000021.9:45204570:A:G	single nucleotide variant	missense variant|non-coding transcript variant	Conflicting classifications of pathogenicity	45047	criteria provided, conflicting classifications
NM_001112.4(ADARB1):c.1628C>T (p.Ser543Leu)	ADARB1	543	S543L	3370262	GeneDx	Phase unknown	This variant has been seen phase unknown with another missense variant in an individual with global developmental delay and hypotonia.	Y	Y	Within the monomer	not provided	VCV003370262	21	46624532	21	45204617	3370262	3529453		NC_000021.9:45204616:C:T	single nucleotide variant	missense variant|non-coding transcript variant	Uncertain significance	45289	criteria provided, single submitter
NM_001112.4(ADARB1):c.1847C>A (p.Thr616Asn)	ADARB1	616	T616N	3340382	GeneDx	Phase unknown	This variant has been seen phase unknown with another missense variant in an individual with global developmental delay and hypotonia	Y	Y	Within the monomer	not provided	VCV003340382	21	46640850	21	45220935	3340382	3499638		NC_000021.9:45220934:C:A	single nucleotide variant	missense variant|non-coding transcript variant	Uncertain significance	45289	criteria provided, single submitter
NM_001112.4(ADARB1):c.1993G>T (p.Ala665Ser)	ADARB1	665	A665S*	977316	Génétique des Maladies du Développement, Hospices Civils de Lyon	Biallelic	This ADARB1 biallelic variant was ruled out because of an alternative molecular diagnosis that was clearly responsible for the phenotype with no doubt on a dual diagnosis.	Y	Y	Within the monomer	Encephalopathy|Microcephaly|Abnormal CNS myelination	VCV000977316	21	46641999	21	45222084	977316	965446	rs1344272743	NC_000021.9:45222083:G:T	single nucleotide variant	missense variant|3 prime UTR variant|non-coding transcript variant	Benign		criteria provided, single submitter
NM_001112.4(ADARB1):c.2021G>A (p.Arg674His)	ADARB1	674	R674H	2365870	Ambry Genetics	Monoallelic (Compound het)	encephalopathy, seizures, global developmental delay, behavioral issues, and dysmorphic features, agenesis of the corpus callosum, gray matter heterotopia involving the right frontal lobe, and multiple small foci of T2 hyperintensity.	Y	Y	Within the monomer	Inborn genetic diseases	VCV002365870	21	46642027	21	45222112	2365870	2350311		NC_000021.9:45222111:G:A	single nucleotide variant	missense variant|non-coding transcript variant|intron variant	Uncertain significance	44664	criteria provided, single submitter
*not included in further analysis because of an alternative molecular diagnosis that was responsible for the phenotype

## Sheet: 4. PolyPhen-2 scores
	R244G
	Prediction/Confidence
	Hum Div – 0.813 Possibly damaging
	HumVar – 0.388 Benign
	T375G
	Prediction/Confidence
	Hum Div – 1 Probably damaging
	HumVar – 0.996 Probably damaging
	G276V
	Prediction/Confidence
	Hum Div – 1 Probably damaging
	HumVar – 1 Probably damaging
	P345L
	Prediction/Confidence
	Hum Div – 0.67 Possibly damaging
	HumVar – 0.252 Benign
	I528V
	Prediction/Confidence
	Hum Div – 0 Benign
	HumVar – 0 Benign
	S543L
	Prediction/Confidence
	Hum Div – 1 Probably damaging
	HumVar – 0.778 Possibly damaging
	T616N
	Prediction/Confidence
	Hum Div – 1 Probably damaging
	HumVar – 0.999 Probably damaging
	R674H
	Prediction/Confidence
	Hum Div – 0.625 Possibly damaging
	HumVar – 0.191 Benign

## Sheet: 5. SIFT scores
	Substitution at pos 244 from R to G is predicted to be TOLERATED with a score of 0.36.
	Median sequence conservation: 3.20
	Sequences represented at this position:9
	Substitution at pos 375 from T to R is predicted to AFFECT PROTEIN FUNCTION with a score of 0.03.
	Median sequence conservation: 3.09
	Sequences represented at this position:12
	Substitution at pos 276 from G to V is predicted to AFFECT PROTEIN FUNCTION with a score of 0.01.
	Median sequence conservation: 3.09
	Sequences represented at this position:12
	Substitution at pos 345 from P to L is predicted to be TOLERATED with a score of 0.68.
	Median sequence conservation: 3.06
	Sequences represented at this position:13
	Substitution at pos 528 from I to V is predicted to be TOLERATED with a score of 1.00.
	Median sequence conservation: 3.06
	Sequences represented at this position:13
	Substitution at pos 543 from S to L is predicted to be TOLERATED with a score of 0.27.
	Median sequence conservation: 3.06
	Sequences represented at this position:13
	Substitution at pos 616 from T to N is predicted to be TOLERATED with a score of 0.30.
	Median sequence conservation: 3.06
	Sequences represented at this position:13
	Substitution at pos 674 from R to H is predicted to be TOLERATED with a score of 0.24.
	Median sequence conservation: 3.06
	Sequences represented at this position:13

## Sheet: 6. FATHMM scores
FATHMM
Inherited Disease Algorithm
	Prediction Algorithm	Weighted
	Phenotypic Associations	Disease Ontology
	Substitution	Prediction	Score
	R244G	TOLERATED	-0.81
	T375R	DAMAGING	-3.57
	G276V	DAMAGING	-2.02
	P345L	TOLERATED	1.3
	I528V	DAMAGING	-3.21
	S543L	DAMAGING	-3.51
	T616N	DAMAGING	-3.29
	R674H	DAMAGING	-3.27

## Sheet: 7. MutPred2 scores
	ID	Substitution	MutPred2 score	Remarks	Affected PROSITE and ELM Motifs
	A2	R244G	0.844	-	None
	Molecular mechanisms with P-values <= 0.05			Probability	P-value
	Loss of Acetylation at K248			0.2	0.04
	Altered Transmembrane protein			0.15	0.02
	Altered Metal binding			0.04	0.05
	ID	Substitution	MutPred2 score	Remarks	Affected PROSITE and ELM Motifs
	A2	T375R	0.873	-	ELME000052, ELME000063, ELME000093, ELME000102, PS00005, PS00009
	Molecular mechanisms with P-values <= 0.05			Probability	P-value
	Gain of Strand			0.29	0.0061
	Gain of ADP-ribosylation at T375			0.26	0.0072
	Altered Metal binding			0.23	0.05
	Altered DNA binding			0.17	0.03
	Loss of Disulfide linkage at C377			0.1	0.05
	ID	Substitution	MutPred2 score	Remarks	Affected PROSITE and ELM Motifs
	A2	G276V	0.851	-	ELME000085, ELME000336, PS00008
	Molecular mechanisms with P-values <= 0.05			Probability	P-value
	Altered DNA binding			0.3	0.0015
	Loss of B-factor			0.26	0.05
	Gain of ADP-ribosylation at R279			0.26	0.0066
	Loss of Relative solvent accessibility			0.23	0.05
	ID	Substitution	MutPred2 score	Remarks	Affected PROSITE and ELM Motifs
	A2	P345L	0.686	-	ELME000070, ELME000136, ELME000159, ELME000247
	Molecular mechanisms with P-values <= 0.05			Probability	P-value
	Loss of Loop			0.26	0.05
	Gain of N-linked glycosylation at N341			0.02	0.03
	ID	Substitution	MutPred2 score	Remarks	Affected PROSITE and ELM Motifs
	A2	I528V	0.183	-	-
	ID	Substitution	MutPred2 score	Remarks	Affected PROSITE and ELM Motifs
	A2	S543L	0.579	-	ELME000182, ELME000335
	Molecular mechanisms with P-values <= 0.05			Probability	P-value
	Altered Ordered interface			0.26	0.02
	Loss of Strand			0.26	0.03
	Altered Transmembrane protein			0.16	0.01
	Loss of Sulfation at Y541			0.01	0.04
	ID	Substitution	MutPred2 score	Remarks	Affected PROSITE and ELM Motifs
	A2	T616N	0.764	-	ELME000070, ELME000220, PS00001, PS00005, PS00006
	Molecular mechanisms with P-values <= 0.05			Probability	P-value
	Loss of Strand			0.27	0.02
	Loss of SUMOylation at K618			0.19	0.04
	Altered Transmembrane protein			0.11	0.03
	Loss of N-linked glycosylation at N613			0.08	0.01
	ID	Substitution	MutPred2 score	Remarks	Affected PROSITE and ELM Motifs
	A2	R674H	0.107	-	-

## Sheet: 8. Chimera modelling
	Substitution - Rotamers -Dunbrack
	Thr375Arg
	T375R
		Chi 1	Chi 2	Chi 3	Chi 4	Prevalance
	Highest	-65	-68	-178.4	-88.6	0.138293
	Arg244Gly
	R244G
	R to G no clashes

## Sheet: 9. Sanger sequencing raw data
	G/(A+G)	as % of WT			G/(A+G)	as % of WT
ADAR2S WT replicate1	0.91	1		ADAR2L WT replicate1	0.82	1
pcDNA3.1 miR376a2 replicate1	0.22	0.241758		pcDNA3.1 miR376a2 replicate1	0.22	0.268293
ADAR2S p.Arg244Gly replicate1	0.74	0.813187		ADAR2L p.Arg244Gly replicate1	0.63	0.768293
ADAR2S p.Thr375Arg replicate1	0	0		ADAR2L p.Thr375Arg replicate1	0	0
	G/(A+G)	as % of WT			G/(A+G)	as % of WT
ADAR2S WT replicate2	0.94	1		ADAR2L WT replicate2	0.9	1
pcDNA3.1 miR376a2 replicate2	0.2	0.212766		pcDNA3.1 miR376a2 replicate2	0.2	0.222222
ADAR2S p.Arg244Gly replicate2	0.79	0.840426		ADAR2L p.Arg244Gly replicate2	0.71	0.788889
ADAR2S p.Thr375Arg replicate2	0	0		ADAR2L p.Thr375Arg replicate2	0	0
	G/(A+G)	as % of WT			G/(A+G)	as % of WT
ADAR2S WT replicate3	0.92	1		ADAR2L WT replicate3	0.91	1
pcDNA3.1 miR376a2 replicate3	0.23	0.25		pcDNA3.1 miR376a2 replicate3	0.23	0.252747
ADAR2S p.Arg244Gly replicate3	0.8	0.869565		ADAR2L p.Arg244Gly replicate3	0.63	0.692308
ADAR2S p.Thr375Arg replicate3	0	0		ADAR2L p.Thr375Arg replicate3	0	0
